# Supplementary material
Source: publisher site journal article supplement (https://www.spandidos-publications.com/2502/downloadSupplementary)
Supplement: Supplementary file 1 [file downloadSupplementary]

## Sheet: Sheet1
Table SIV. Overall survival of all DE long non-coding RNAs, DEmiRNAs and DEmRNAs in rectosigmoid junction cancer.
Name	Hazard ratio	Lower 95% CI	Upper 95% CI	P-value
hsa-miR-21-5p	0.567077	0.190951	1.68408	0.312
hsa-miR-197-3p	2.82578	0.949216	8.41223	0.0945
hsa-miR-328-3p	1.94333	0.653305	5.78063	0.254
hsa-miR-766-3p	2.0927	0.698693	6.268	0.184
hsa-let-7d-3p	2.20382	0.743002	6.53678	0.175
hsa-miR-126-3p	3.19513	1.07701	9.47885	0.0608
hsa-miR-139-5p	1.75177	0.585616	5.24012	0.344
hsa-miR-101-3p	0.516539	0.173623	1.53674	0.26
hsa-miR-1306-5p	5.35973	1.75229	16.3938	0.00362
hsa-miR-106b-5p	1.44489	0.486472	4.2915	0.516
hsa-miR-24-2-5p	1.23268	0.411784	3.69006	0.712
hsa-miR-6511b-3p	0.73771	0.241696	2.25165	0.578
hsa-miR-129-5p	1.17168	0.395045	3.47514	0.775
hsa-miR-149-5p	0.919925	0.297438	2.84518	0.88
hsa-miR-574-3p	1.37426	0.461662	4.09086	0.56
hsa-miR-99b-5p	1.94032	0.652254	5.77204	0.259
hsa-miR-452-5p	0.550098	0.18056	1.67594	0.267
hsa-miR-192-5p	1.00554	0.328722	3.07589	0.992
hsa-miR-141-3p	0.835073	0.281529	2.477	0.745
hsa-miR-24-3p	1.16054	0.391288	3.4421	0.788
hsa-miR-194-5p	0.678024	0.226901	2.02607	0.479
hsa-miR-379-5p	1.01482	0.341256	3.01786	0.979
hsa-miR-195-3p	1.76354	0.580914	5.35375	0.294
hsa-miR-889-3p	0.791357	0.264801	2.36497	0.679
hsa-miR-429	1.57621	0.524927	4.73291	0.403
hsa-miR-19b-3p	0.976186	0.327713	2.90784	0.965
hsa-miR-125a-5p	0.626967	0.200511	1.96043	0.383
hsa-miR-139-3p	0.669592	0.223896	2.00251	0.467
hsa-miR-130b-3p	0.549666	0.180401	1.67479	0.268
hsa-let-7e-3p	0.888902	0.296703	2.66309	0.831
hsa-miR-140-5p	1.14881	0.381588	3.45861	0.807
hsa-miR-1976	2.30422	0.776835	6.8347	0.151
hsa-miR-26b-5p	1.0652	0.351131	3.23145	0.911
hsa-miR-200a-3p	1.14595	0.381962	3.43807	0.804
hsa-miR-16-5p	1.20901	0.401115	3.64411	0.728
hsa-miR-141-5p	0.67998	0.227597	2.03154	0.475
hsa-miR-374a-3p	0.800319	0.264663	2.4201	0.684
hsa-miR-378a-5p	0.925764	0.311881	2.74797	0.889
hsa-let-7b-3p	1.4083	0.472541	4.19709	0.535
hsa-miR-29b-3p	1.53672	0.507958	4.64904	0.46
hsa-miR-374a-5p	0.620157	0.206132	1.86577	0.379
hsa-miR-98-5p	1.42107	0.478215	4.22286	0.535
hsa-miR-17-5p	0.907999	0.303536	2.71619	0.86
hsa-miR-486-5p	1.12322	0.378633	3.33205	0.834
hsa-miR-148a-3p	2.18619	0.727383	6.5707	0.157
hsa-miR-142-5p	1.56541	0.521621	4.69785	0.407
hsa-miR-20a-5p	0.72094	0.235503	2.207	0.54
hsa-miR-30e-5p	1.6415	0.522326	5.15871	0.354
hsa-miR-542-3p	0.974603	0.327863	2.8971	0.963
hsa-miR-193a-5p	1.17399	0.390691	3.52772	0.777
hsa-miR-642a-5p	0.94424	0.311054	2.86635	0.918
hsa-miR-590-5p	1.00298	0.337032	2.98476	0.996
hsa-miR-455-5p	0.263411	0.0886083	0.78306	0.0226
hsa-miR-145-5p	1.20276	0.401054	3.60708	0.745
hsa-miR-32-5p	0.747008	0.251216	2.22128	0.598
hsa-miR-423-3p	0.628372	0.2091	1.88834	0.392
hsa-miR-182-5p	1.25806	0.420847	3.76079	0.686
hsa-miR-142-3p	1.93289	0.629392	5.93597	0.206
hsa-miR-589-5p	1.73324	0.583875	5.14516	0.326
hsa-miR-27a-3p	0.544024	0.182407	1.62253	0.3
hsa-miR-454-3p	0.598999	0.198457	1.80795	0.351
hsa-miR-15a-5p	0.715026	0.233315	2.1913	0.53
hsa-miR-1296-5p	1.06696	0.35935	3.16798	0.906
hsa-miR-150-5p	1.22517	0.409095	3.66919	0.715
hsa-miR-146b-5p	0.806164	0.254834	2.55029	0.696
hsa-miR-203a-3p	0.979876	0.321384	2.98757	0.971
hsa-miR-193b-5p	1.06983	0.360338	3.17628	0.903
hsa-let-7a-3p	0.921588	0.304401	2.79015	0.884
hsa-miR-671-3p	2.04014	0.65909	6.31505	0.184
hsa-miR-424-5p	0.537281	0.180266	1.60136	0.286
hsa-miR-4677-3p	1.00801	0.338649	3.00038	0.989
hsa-miR-335-3p	0.358686	0.108905	1.18135	0.0392
hsa-let-7b-5p	0.925657	0.311845	2.74765	0.889
hsa-miR-2355-5p	0.595934	0.198587	1.78832	0.382
hsa-miR-532-3p	0.700404	0.234843	2.08891	0.515
hsa-miR-744-5p	1.82976	0.615416	5.44024	0.274
hsa-miR-19b-1-5p	0.806928	0.267072	2.43804	0.693
hsa-miR-92b-3p	1.26211	0.425177	3.74648	0.67
hsa-miR-99b-3p	0.655345	0.218801	1.96287	0.441
hsa-miR-152-3p	1.16908	0.38892	3.51423	0.783
hsa-miR-151a-3p	1.19181	0.397116	3.57684	0.756
hsa-miR-126-5p	1.2809	0.42247	3.88357	0.651
hsa-miR-485-3p	0.481622	0.160891	1.44172	0.189
hsa-miR-433-3p	1.78561	0.601054	5.30468	0.3
hsa-miR-29b-2-5p	0.959938	0.321984	2.86188	0.941
hsa-miR-374b-5p	1.13811	0.383695	3.37584	0.815
hsa-miR-194-3p	0.292526	0.09862	0.867687	0.0459
hsa-miR-342-5p	0.806489	0.27178	2.3932	0.697
hsa-miR-20a-3p	0.899385	0.300457	2.69221	0.847
hsa-miR-186-5p	3.45626	1.16511	10.2529	0.044
hsa-miR-10b-5p	1.38191	0.451049	4.23385	0.583
hsa-miR-660-5p	0.58893	0.198469	1.74757	0.338
hsa-miR-19a-3p	0.686769	0.231273	2.03937	0.499
hsa-miR-185-5p	0.898718	0.300218	2.69035	0.847
hsa-miR-133a-3p	1.597	0.538448	4.7366	0.403
hsa-miR-136-3p	0.979207	0.321192	2.98527	0.97
hsa-miR-96-5p	0.85355	0.283983	2.56546	0.768
hsa-miR-582-3p	2.30426	0.762948	6.95932	0.128
hsa-miR-1180-3p	0.480704	0.154823	1.49252	0.171
hsa-miR-326	1.07522	0.359997	3.21139	0.896
hsa-miR-15b-3p	0.943442	0.310821	2.86365	0.917
hsa-miR-552-5p	0.293798	0.0990515	0.871437	0.0431
hsa-miR-23a-5p	2.72433	0.913468	8.12504	0.108
hsa-miR-18a-5p	1.05089	0.352326	3.13454	0.928
hsa-miR-22-3p	1.12686	0.373624	3.39862	0.833
hsa-miR-335-5p	1.30906	0.438955	3.90393	0.633
hsa-miR-127-5p	1.03272	0.346555	3.07749	0.954
hsa-miR-324-3p	1.15063	0.382247	3.4636	0.804
hsa-miR-6892-5p	1.06248	0.355988	3.17109	0.913
hsa-miR-33a-5p	0.770651	0.258288	2.29939	0.646
hsa-miR-150-3p	1.79737	0.604892	5.3407	0.295
hsa-miR-17-3p	0.481919	0.160997	1.44255	0.185
hsa-miR-10a-5p	1.33277	0.447324	3.97091	0.612
hsa-miR-484	1.25962	0.424355	3.73893	0.675
hsa-miR-135b-5p	0.984909	0.331203	2.92885	0.978
hsa-miR-144-5p	0.901986	0.304008	2.67618	0.852
hsa-miR-370-3p	2.09159	0.704693	6.20801	0.207
hsa-miR-7-1-3p	0.682294	0.224349	2.075	0.516
hsa-miR-26a-5p	0.958929	0.31194	2.94782	0.941
hsa-miR-181a-5p	1.26269	0.422497	3.77373	0.681
hsa-miR-200b-3p	0.998509	0.335594	2.97091	0.998
hsa-miR-552-3p	0.243981	0.0817845	0.72785	0.0186
hsa-miR-29c-3p	0.56703	0.190935	1.68394	0.312
hsa-miR-222-5p	1.14332	0.381154	3.42955	0.807
hsa-miR-3605-3p	2.57948	0.797489	8.34333	0.0623
hsa-miR-3127-5p	1.30054	0.43594	3.87992	0.643
hsa-miR-224-5p	0.492354	0.164723	1.47164	0.199
hsa-miR-183-5p	3.37767	1.13879	10.0182	0.0484
hsa-miR-193b-3p	0.865411	0.277073	2.70303	0.791
hsa-miR-582-5p	1.4504	0.488379	4.30743	0.51
hsa-miR-195-5p	1.16777	0.393727	3.46353	0.778
hsa-miR-452-3p	0.984593	0.33067	2.93169	0.977
hsa-miR-34a-5p	1.41311	0.462581	4.31683	0.546
hsa-miR-369-3p	1.09688	0.366778	3.28031	0.867
hsa-miR-190a-5p	0.375797	0.125833	1.12231	0.117
hsa-miR-30b-5p	0.753996	0.247695	2.29521	0.6
hsa-miR-21-3p	1.07751	0.360718	3.21868	0.892
hsa-miR-450b-5p	0.70516	0.237283	2.0956	0.535
hsa-let-7f-1-3p	1.65428	0.548569	4.98868	0.353
hsa-miR-16-2-3p	0.449945	0.151701	1.33453	0.171
hsa-miR-199b-3p	1.45047	0.485899	4.32984	0.5
hsa-miR-199a-3p	1.45047	0.485899	4.32984	0.5
hsa-miR-411-5p	0.565206	0.186112	1.71648	0.296
hsa-miR-505-3p	1.03901	0.349674	3.08726	0.944
hsa-miR-22-5p	1.16398	0.387476	3.49657	0.784
hsa-miR-146b-3p	0.921275	0.29794	2.84871	0.883
hsa-miR-708-3p	1.01935	0.342836	3.03083	0.972
hsa-miR-223-3p	0.613433	0.203697	1.84735	0.364
hsa-miR-125b-5p	0.904789	0.291794	2.80555	0.858
hsa-miR-432-5p	2.26083	0.762265	6.70551	0.155
hsa-miR-7-5p	0.617886	0.208324	1.83264	0.391
hsa-miR-590-3p	2.6548	0.864283	8.15469	0.0692
hsa-miR-193a-3p	0.716718	0.234231	2.19306	0.568
hsa-miR-337-3p	1.22161	0.40782	3.65931	0.72
hsa-miR-3615	0.450071	0.151743	1.33491	0.171
hsa-miR-409-5p	1.3515	0.454336	4.02027	0.585
hsa-miR-495-3p	1.20915	0.407607	3.58687	0.732
hsa-miR-28-5p	0.945	0.316699	2.81979	0.918
hsa-miR-136-5p	1.90281	0.638938	5.66671	0.249
hsa-miR-361-3p	1.00317	0.328315	3.06518	0.995
hsa-miR-30d-3p	1.22452	0.412731	3.63302	0.714
hsa-miR-1468-5p	1.06256	0.350162	3.22432	0.913
hsa-miR-3613-5p	1.15205	0.383831	3.45783	0.798
hsa-miR-296-5p	0.66349	0.221716	1.98551	0.448
hsa-let-7f-5p	1.74027	0.581508	5.2081	0.347
hsa-miR-148b-5p	2.69406	0.875248	8.29244	0.0672
hsa-miR-301a-3p	1.76452	0.581202	5.35708	0.293
hsa-miR-199b-5p	0.638122	0.212615	1.9152	0.412
hsa-miR-340-5p	1.14924	0.381744	3.45979	0.807
hsa-miR-153-5p	1.15845	0.390582	3.43591	0.791
hsa-let-7g-5p	1.36118	0.457309	4.05154	0.585
hsa-miR-493-3p	1.89762	0.637279	5.65054	0.249
hsa-miR-95-3p	0.870171	0.293379	2.58095	0.801
hsa-miR-203b-3p	1.14462	0.381552	3.43375	0.803
hsa-miR-629-3p	1.09185	0.365206	3.26425	0.874
hsa-miR-577	2.91524	0.973973	8.72571	0.0614
hsa-miR-181b-3p	1.18067	0.376604	3.70144	0.761
hsa-miR-7706	0.857586	0.272513	2.69879	0.789
hsa-miR-363-3p	0.888815	0.296672	2.66285	0.83
hsa-miR-378a-3p	1.16557	0.387964	3.50178	0.78
hsa-miR-218-5p	0.638965	0.205003	1.99156	0.409
hsa-miR-592	0.490636	0.16411	1.46684	0.195
hsa-miR-125a-3p	1.01323	0.332028	3.09202	0.982
hsa-let-7i-3p	0.735203	0.246995	2.1884	0.587
hsa-miR-3074-5p	0.579471	0.193513	1.73522	0.351
hsa-miR-133b	1.0305	0.345846	3.07054	0.957
hsa-miR-431-3p	1.03787	0.341098	3.15794	0.947
hsa-miR-196a-5p	0.810488	0.273149	2.40488	0.703
hsa-miR-339-5p	0.718195	0.234488	2.19971	0.536
hsa-miR-425-5p	1.12565	0.379459	3.33918	0.831
hsa-miR-16-1-3p	0.807832	0.26994	2.41754	0.707
hsa-miR-26a-2-3p	0.722276	0.242832	2.14833	0.565
hsa-miR-664b-3p	2.46814	0.821994	7.41091	0.135
hsa-miR-215-5p	0.690196	0.226637	2.10191	0.519
hsa-miR-143-3p	1.09366	0.365773	3.27004	0.87
hsa-miR-708-5p	0.938156	0.304224	2.89306	0.909
hsa-miR-651-5p	1.06526	0.35876	3.16303	0.905
hsa-miR-30c-2-3p	1.09939	0.363625	3.32389	0.867
hsa-miR-106b-3p	1.12453	0.354922	3.56294	0.837
hsa-miR-130a-3p	1.24432	0.415944	3.72246	0.699
hsa-miR-505-5p	4.93881	1.66256	14.6713	0.0208
hsa-miR-10b-3p	1.75594	0.587104	5.25175	0.338
hsa-miR-188-5p	0.43051	0.145132	1.27704	0.146
hsa-miR-628-5p	1.83677	0.571732	5.9009	0.241
hsa-miR-107	1.00676	0.338441	2.99483	0.99
hsa-miR-196b-5p	0.790252	0.264455	2.36145	0.673
hsa-miR-29a-5p	2.35491	0.77798	7.1282	0.119
hsa-miR-10a-3p	1.19939	0.398218	3.61243	0.742
hsa-miR-375	0.821938	0.274311	2.46284	0.726
hsa-miR-374b-3p	0.585	0.197123	1.73611	0.339
hsa-miR-1307-3p	0.647365	0.21823	1.92037	0.44
hsa-miR-1271-5p	5.05844	1.66552	15.3632	0.0055
hsa-miR-217	1.02406	0.336019	3.12096	0.966
hsa-miR-23a-3p	1.60779	0.513479	5.03426	0.37
hsa-miR-3913-5p	0.20342	0.0671885	0.615874	0.0057
hsa-miR-421	0.582682	0.18388	1.84641	0.307
hsa-miR-500b-5p	1.02001	0.343066	3.03272	0.971
hsa-miR-500a-5p	1.02001	0.343066	3.03272	0.971
hsa-miR-331-3p	2.36873	0.745489	7.52642	0.0968
hsa-miR-24-1-5p	3.05787	1.02995	9.07862	0.0729
hsa-miR-30a-5p	1.13128	0.381375	3.35574	0.824
hsa-miR-146a-5p	0.904038	0.30469	2.68235	0.855
hsa-miR-365a-3p	1.0045	0.328805	3.06872	0.994
hsa-miR-365b-3p	1.0045	0.328805	3.06872	0.994
hsa-miR-376c-3p	0.671598	0.224611	2.00811	0.469
hsa-let-7c-5p	0.901617	0.29061	2.79727	0.85
hsa-miR-92a-3p	0.613292	0.195383	1.92507	0.354
hsa-miR-181a-3p	1.10077	0.370967	3.26632	0.862
hsa-miR-381-3p	0.458188	0.152469	1.37691	0.154
hsa-miR-2355-3p	0.739807	0.248472	2.20272	0.595
hsa-miR-2110	1.53642	0.512705	4.60417	0.423
hsa-miR-1-3p	1.20009	0.404582	3.55979	0.74
hsa-miR-503-5p	0.79672	0.266478	2.38204	0.689
hsa-miR-1301-3p	1.82407	0.611332	5.44257	0.304
hsa-miR-874-3p	1.54969	0.522425	4.59693	0.437
hsa-miR-140-3p	0.808809	0.267757	2.44315	0.698
hsa-miR-3677-3p	0.771365	0.258513	2.30164	0.646
hsa-miR-937-3p	2.20264	0.742601	6.53329	0.176
hsa-miR-758-5p	0.599853	0.198767	1.81028	0.349
hsa-miR-653-5p	2.92519	0.977061	8.75761	0.06
hsa-miR-877-5p	1.42614	0.47821	4.25311	0.514
hsa-miR-192-3p	0.620083	0.205933	1.86712	0.411
hsa-miR-30b-3p	4.59658	1.54302	13.693	0.0275
SPATA25	0.0951731	0.0283664	0.319319	5.86e-05
DGAT2	0.0624178	0.0197313	0.197452	0.000246
PLAGL2	0.122386	0.0381416	0.392705	0.000858
RETREG1	0.0804161	0.0258808	0.249867	0.00181
CALM1	7.2292	2.28704	22.851	0.00183
FAM160A1	0.136918	0.0432686	0.433262	0.00203
KLHL31	0.187368	0.0576403	0.609065	0.00329
NPEPL1	0.156793	0.0501467	0.490244	0.00389
RRN3P1	0.225657	0.0664674	0.766106	0.00425
KIF1C	5.09706	1.57949	16.4483	0.00441
DSN1	0.195602	0.0605859	0.6315	0.00454
TMEM147-AS1	0.206324	0.0644029	0.66099	0.00562
SHB	5.07437	1.57352	16.3641	0.00601
APBA1	4.70013	1.4731	14.9964	0.00607
MHENCR	0.208483	0.0651686	0.666965	0.00638
PLOD3	6.1431	1.96943	19.1618	0.00721
FAM92A	0.204209	0.0636516	0.655147	0.00754
CARD14	0.215323	0.0675881	0.685977	0.00774
ADCY3	0.250894	0.0756044	0.832594	0.00791
SNHG20	0.221731	0.0698458	0.703904	0.00893
STPG4	0.221173	0.0696496	0.702339	0.00923
MTBP	0.243233	0.0728345	0.812284	0.00949
AL161891.1	0.25307	0.0763906	0.838384	0.0115
ZFP69B	0.222398	0.0700801	0.705775	0.0121
LINC01138	0.223732	0.0705488	0.709523	0.0122
RBL1	0.275847	0.0780841	0.974486	0.0124
TIMP1	4.39793	1.38928	13.9221	0.0129
SALL4	0.259778	0.0788109	0.856282	0.0132
CDK5	4.42869	1.39793	14.0302	0.0134
EPHX4	0.183659	0.0591732	0.570034	0.0136
MYO1C	3.75386	1.14415	12.3162	0.0137
TGIF2	0.27347	0.0837397	0.893078	0.0143
NSUN5P2	0.242198	0.0769927	0.761889	0.0144
AL928654.5	0.186584	0.0601363	0.578911	0.0148
ZC3H8	0.283719	0.0809363	0.994569	0.0149
SEMA5B	4.32329	1.3682	13.661	0.0152
MTERF3	0.270117	0.0825342	0.884034	0.0155
AC120114.2	0.272433	0.0833669	0.890278	0.0156
PAG1	0.233321	0.0739053	0.736604	0.0168
NNAT	0.236329	0.0749536	0.745149	0.0171
CAPN13	0.234222	0.0742193	0.73916	0.0172
RPGRIP1L	0.268398	0.0819159	0.879407	0.0176
FGFBP1	4.12528	1.3115	12.976	0.0193
MYL6	3.32189	0.962414	11.4659	0.0198
MARCH-II	3.64695	1.11725	11.9044	0.0206
GPR37L1	3.57947	1.10006	11.6471	0.0211
SGK2	0.251487	0.0802027	0.788572	0.0217
AL121832.3	0.24972	0.0795938	0.783479	0.0224
MIR4435-2HG	4.8794	1.57358	15.1302	0.0231
VAPA	3.47748	1.07376	11.2622	0.0237
INTS13	0.250523	0.0798705	0.785792	0.0239
MEX3A	0.318455	0.0935346	1.08423	0.0243
SLC6A6	0.254883	0.081371	0.798385	0.0244
CLU	7.18761	2.25932	22.8661	0.0244
TCTE3	0.29101	0.0900245	0.94071	0.026
SNHG6	0.293523	0.090922	0.94758	0.0263
RGS2	4.64506	1.49698	14.4134	0.0277
EIF2S2	0.320858	0.0944062	1.0905	0.028
TOM1L2	3.82289	1.22275	11.9522	0.0284
ZNF514	0.315271	0.0923797	1.07595	0.0285
GPR4	3.81063	1.21909	11.9112	0.0287
TTYH3	3.43345	1.06228	11.0974	0.0294
TPX2	0.304031	0.0946663	0.976431	0.0295
TPD52L2	0.304909	0.0949783	0.978848	0.0295
SNCG	3.81446	1.22023	11.924	0.0296
PRADC1	3.05848	0.903799	10.35	0.0316
TMEM9	3.06817	0.906011	10.3902	0.0324
AC245140.2	0.311232	0.0972236	0.996313	0.0337
GPX3	3.32772	1.03442	10.7053	0.0339
FOXP4-AS1	0.305228	0.0950918	0.979728	0.0342
NSUN5	3.7112	1.1893	11.5808	0.0344
CDKN1A	3.26765	1.01839	10.4847	0.0345
CDCA7	0.313494	0.0980254	1.00258	0.0357
TAMM41	0.228056	0.0733738	0.70883	0.0362
TTC26	0.330347	0.0978464	1.11531	0.0371
ARL4D	4.28032	1.37579	13.3169	0.0381
CGREF1	0.326107	0.102484	1.03768	0.0386
ACTG2	3.58967	1.15248	11.1809	0.0389
MTG2	0.31835	0.0997447	1.01606	0.0391
CLDN5	3.239	1.0107	10.3801	0.0394
TESC	3.57762	1.14881	11.1415	0.0394
SLC12A2	0.281151	0.0903061	0.875313	0.0404
P3H1	3.16319	0.990186	10.1049	0.0407
FGF13	3.52416	1.13245	10.9671	0.0408
SLC5A6	0.355127	0.106816	1.18067	0.041
ZNF74	0.286202	0.0920033	0.890313	0.041
ATP6V1F	3.18438	0.995942	10.1816	0.041
LIMK1	3.55826	1.14289	11.0782	0.0414
TTLL7	3.5128	1.12897	10.9301	0.0417
RBBP8NL	0.329889	0.103816	1.04826	0.0427
LY6G6D	0.350906	0.10529	1.16948	0.0427
B4GALT1-AS1	3.10542	0.9744	9.89697	0.0428
C1QTNF2	3.11785	0.97781	9.94161	0.0432
GABRD	4.17317	1.33973	12.9992	0.044
GLTP	3.04229	0.956997	9.67141	0.046
STX16	0.356124	0.0984481	1.28823	0.0461
SCG2	4.10834	1.31781	12.808	0.0465
SPATA33	0.294739	0.0948561	0.915818	0.0466
VSIR	3.00783	0.947428	9.54903	0.0471
PLEKHG4	0.290124	0.0933165	0.902008	0.0473
TMPRSS2	3.02202	0.951375	9.59936	0.048
C20orf194	4.0707	1.30505	12.6973	0.0487
NDNF	3.06877	0.964318	9.76583	0.049
EGLN3	3.08271	0.968159	9.81563	0.0492
ALDH1A1	3.40392	1.09536	10.578	0.0493
RILP	2.83508	0.851571	9.43863	0.0496
TP53RK	0.337982	0.10666	1.07099	0.0508
GALNT12	2.96346	0.935037	9.39224	0.0511
CCDC152	0.29624	0.0953557	0.920322	0.0513
WDR75	0.355371	0.106904	1.18132	0.0516
SLC22A4	0.298807	0.0962088	0.92804	0.0518
DNMT3B	0.355155	0.106826	1.18075	0.0518
LGR4	0.300847	0.0968855	0.934187	0.0522
MGC32805	0.298106	0.0959759	0.925931	0.0525
CYP2S1	0.303525	0.0977719	0.94227	0.0531
TOX	2.94001	0.928454	9.30971	0.0532
ZNF280C	0.332998	0.10491	1.05698	0.0538
AC005839.1	0.349542	0.104797	1.16587	0.055
C2orf15	0.339033	0.107028	1.07395	0.0559
KCND3	3.26244	1.05116	10.1255	0.056
GPER1	3.29571	1.06161	10.2314	0.0562
HGD	2.83888	0.85248	9.45387	0.0568
YTHDF1	0.366163	0.110802	1.21004	0.057
MCTS2P	0.306359	0.0987078	0.950844	0.0587
KCTD9	3.10841	1.00235	9.63956	0.0592
SRGAP2C	3.8685	1.23609	12.1069	0.0592
DLGAP1-AS2	0.307453	0.0990684	0.954159	0.0595
RAB3A	2.9572	0.933282	9.37017	0.0597
ELFN1-AS1	0.372377	0.113044	1.22665	0.0602
MATN2	0.308311	0.0993511	0.956762	0.0606
ETFDH	2.90486	0.918547	9.18648	0.0614
MPPE1	2.70044	0.818922	8.90487	0.062
KLF2	2.93924	0.928239	9.30701	0.0622
COL27A1	0.346027	0.109477	1.0937	0.0623
SPINK5	2.88577	0.913144	9.11978	0.0633
CCL20	0.312246	0.100645	0.968727	0.0637
S100A11	2.68785	0.815822	8.85553	0.0638
FEZF1-AS1	2.63879	0.803666	8.66431	0.0644
KCNQ1OT1	0.358789	0.113924	1.12996	0.0645
TMEM74B	0.37716	0.114767	1.23946	0.0645
LINC01569	0.355127	0.112651	1.11952	0.0654
GDPD2	0.272109	0.0865897	0.855103	0.0663
MAGI3	0.316196	0.10194	0.980775	0.0663
POLG2	0.348179	0.110229	1.09979	0.0668
METTL7A	0.316145	0.101923	0.980619	0.067
SHROOM4	0.348914	0.110485	1.10188	0.0682
GAB1	0.346295	0.10957	1.09446	0.0685
FANCB	0.349268	0.110609	1.10288	0.0686
STC2	0.381923	0.116482	1.25225	0.0697
DKC1	0.381487	0.116325	1.25108	0.07
TMOD2	0.349591	0.110721	1.1038	0.0702
B3GALT5	2.55868	0.783551	8.35537	0.0707
POP1	0.352525	0.111744	1.11212	0.0719
SDK1	0.361931	0.115015	1.13893	0.0725
DTNA	3.07357	0.991208	9.53059	0.0728
AMER1	0.383717	0.117128	1.25708	0.0728
CAVIN1	3.60238	1.14427	11.3409	0.0735
HKDC1	0.325517	0.104978	1.00937	0.0738
RNF144A	0.353997	0.112257	1.11631	0.0744
SYNM	3.06269	0.987723	9.49666	0.0758
PTK7	0.391833	0.120045	1.27896	0.0761
HACD1	2.81428	0.892776	8.87143	0.0762
CHST6	2.56874	0.786096	8.39395	0.0766
HM13	0.364202	0.115803	1.14542	0.0771
AKAP7	0.327978	0.105776	1.01696	0.0772
CDK5RAP1	0.368713	0.117364	1.15835	0.0776
BX890604.1	0.369347	0.117584	1.16017	0.0788
KCNIP4	0.365242	0.116163	1.1484	0.0791
POLR1D	3.02421	0.975363	9.37685	0.0799
BAG2	3.02231	0.974753	9.37096	0.0799
PPP2CB	2.97119	0.958261	9.21251	0.0801
BMP5	0.288457	0.0912803	0.911558	0.081
TNS2	3.00083	0.967833	9.30429	0.0813
SPNS2	0.336971	0.108678	1.04482	0.0813
FSIP2	0.365351	0.116201	1.14871	0.0816
VLDLR	2.73377	0.869577	8.59441	0.082
PPAT	0.401789	0.114971	1.40412	0.0821
MYC	0.372135	0.118547	1.16818	0.0824
JADE3	0.364941	0.116059	1.14754	0.0825
PKP1	0.340937	0.109951	1.05717	0.0827
SCN4B	2.69733	0.858987	8.46997	0.0843
B3GALT4	2.49963	0.768506	8.13024	0.0847
C3orf70	2.69162	0.857322	8.45053	0.0849
FCMR	2.46446	0.75946	7.99724	0.0852
SP6	0.397335	0.122021	1.29384	0.0852
ARHGEF18	0.371153	0.118208	1.16536	0.0856
ADAMTS8	2.6633	0.849045	8.3543	0.0863
TMEM97	0.338313	0.10911	1.049	0.0871
PUS1	2.70012	0.859798	8.47947	0.0879
PCED1A	0.3783	0.120672	1.18594	0.0884
BBOX1-AS1	0.341612	0.110168	1.05928	0.0889
CAVIN2	3.41558	1.07913	10.8107	0.0892
IRAK2	0.376105	0.119916	1.17961	0.0911
TAF1D	0.403975	0.124401	1.31185	0.0927
UGDH	2.64579	0.843909	8.29495	0.0937
SLC23A1	0.345773	0.111498	1.0723	0.0937
CHD7	0.400465	0.123143	1.30233	0.0941
PMS2P3	0.39183	0.125314	1.22516	0.0964
ARHGAP42	0.398607	0.122477	1.29729	0.0966
HENMT1	0.382281	0.122042	1.19745	0.0971
AC025594.2	0.397825	0.127361	1.24264	0.0982
BCL10	2.40414	0.743785	7.77089	0.0985
GNAI1	2.5201	0.80666	7.87309	0.0987
MEIS2	2.83727	0.914677	8.80102	0.0994
PBLD	0.351515	0.113326	1.09033	0.0994
BTBD16	2.62467	0.837699	8.22359	0.1
KCP	0.387727	0.12391	1.21324	0.1
FEZ2	0.404246	0.124498	1.31259	0.102
AC073335.2	0.413	0.127631	1.33642	0.102
RNF139-AS1	0.415898	0.128667	1.34433	0.102
EPM2A	2.80496	0.904082	8.70254	0.103
CHPF	2.60501	0.831898	8.15731	0.104
SMIM6	0.357663	0.115273	1.10974	0.105
CD3EAP	0.417454	0.129223	1.34859	0.105
CASC21	0.422056	0.130865	1.36118	0.105
CHP1	2.41311	0.746128	7.8044	0.105
COMT	2.57211	0.822157	8.04682	0.105
BDKRB1	2.57339	0.822538	8.05112	0.106
EVPL	0.390474	0.124851	1.22122	0.106
CPNE7	0.402958	0.129109	1.25766	0.106
C9orf16	2.45703	0.757539	7.96923	0.106
SLC7A5	0.422293	0.13095	1.36183	0.107
CAMK2D	2.77597	0.894547	8.61442	0.107
PDRG1	0.401925	0.128758	1.25464	0.107
DUS3L	0.364119	0.117307	1.13022	0.107
PSD	2.56632	0.820437	8.0274	0.108
LINC01748	0.391346	0.125149	1.22376	0.108
STEAP4	2.55203	0.816189	7.97962	0.108
EHD2	2.78572	0.897757	8.64403	0.108
GCNT4	2.53602	0.811415	7.92613	0.109
MZB1	0.361231	0.116398	1.12104	0.109
ACADS	2.35162	0.682841	8.09871	0.11
SS18L1	0.423702	0.131453	1.36569	0.111
PDZRN3	2.75927	0.889043	8.56378	0.112
SCARB1	0.369466	0.118982	1.14727	0.112
ADAMTSL4	2.74363	0.88388	8.51641	0.113
CPNE1	0.425035	0.131928	1.36935	0.114
SPART	2.67859	0.862333	8.32025	0.114
UCKL1	0.410785	0.131764	1.28065	0.114
AOC1	2.30765	0.7183	7.41369	0.114
P3H2	2.30961	0.718823	7.42088	0.115
SNHG1	0.401492	0.12861	1.25337	0.115
TCEAL3	2.71234	0.873532	8.4219	0.115
UNC5CL	0.405075	0.129828	1.26387	0.115
RPUSD1	2.41249	0.745967	7.8021	0.116
SULT1A1	0.407094	0.130513	1.2698	0.117
TMEM171	2.34277	0.727635	7.543	0.117
DDN	0.435021	0.135483	1.3968	0.117
LRRC66	2.33355	0.725193	7.50901	0.118
PTP4A1	2.70949	0.872587	8.4133	0.118
ZNF239	0.401518	0.128619	1.25344	0.118
AC090152.1	2.33804	0.726382	7.52555	0.118
FKBP1B	2.47329	0.79261	7.71774	0.118
HNRNPA1P48	2.38017	0.737502	7.68161	0.118
SH3TC2	0.400981	0.128436	1.25187	0.118
MAPK10	2.70745	0.871912	8.40716	0.119
NLGN3	2.68643	0.86494	8.34385	0.119
AC024060.1	0.404786	0.12973	1.26302	0.12
GALNT6	0.419423	0.129926	1.35397	0.121
UBE3D	0.373293	0.120177	1.15952	0.121
SRI	2.31142	0.719306	7.42753	0.122
NEXN	3.06483	0.955378	9.8319	0.123
ADAT2	0.4287	0.133234	1.37941	0.123
PLEKHA8P1	0.424717	0.131815	1.36848	0.123
SSC5D	2.68094	0.863116	8.32733	0.123
MDFIC	2.67485	0.861091	8.30901	0.123
SLC35A1	2.65958	0.856012	8.26315	0.125
TTC28	0.429004	0.133342	1.38024	0.127
SEMA4G	2.28094	0.711155	7.31586	0.127
AXIN2	0.440596	0.137464	1.41219	0.128
GDPD3	2.30764	0.718297	7.41365	0.129
TRPM6	0.386345	0.124221	1.20159	0.13
IGKV1-27	0.38287	0.123149	1.19035	0.13
IGHV4-28	0.381002	0.122571	1.18431	0.131
SLC7A6	2.89071	0.893314	9.35417	0.131
PLAC9	2.26428	0.706675	7.25502	0.133
SYNGR1	2.61237	0.840267	8.12181	0.133
PRMT3	0.433831	0.13506	1.39352	0.133
R3HDML	0.441909	0.13793	1.41582	0.133
IGLV7-46	0.382803	0.123128	1.19013	0.134
E2F1	0.416535	0.133709	1.29761	0.134
ARG2	0.415755	0.133445	1.2953	0.134
MFN2	2.42008	0.776523	7.54235	0.135
CCDC113	0.417083	0.133894	1.29923	0.135
ARHGEF19	0.448237	0.140174	1.43333	0.135
ZMIZ2	2.56774	0.825318	7.98877	0.136
KIAA0907	0.415272	0.133282	1.29388	0.137
PTPRH	2.20067	0.649227	7.45953	0.138
PALLD	2.58408	0.830797	8.0374	0.138
PLEKHO1	2.39536	0.769006	7.46127	0.138
CEACAM1	2.37925	0.764091	7.40857	0.138
TNS4	2.38272	0.76515	7.41991	0.138
DDX11	0.430244	0.13832	1.33827	0.138
TXNIP	2.29972	0.739664	7.15013	0.138
C16orf62	2.36807	0.760675	7.37208	0.139
PTPN21	0.437832	0.136482	1.40455	0.14
ACTL10	0.434833	0.139857	1.35196	0.14
AC016027.1	0.420038	0.13489	1.30797	0.142
ENC1	0.42128	0.135309	1.31164	0.142
TESK2	0.391243	0.125727	1.21749	0.143
FABP2	2.34774	0.754449	7.30587	0.143
DES	2.3641	0.759461	7.35914	0.144
SMTN	2.51858	0.808787	7.84294	0.144
ACKR1	2.36484	0.759687	7.36155	0.145
NXT1	0.393576	0.126442	1.22509	0.146
SLCO4A1-AS1	2.48688	0.798086	7.74923	0.146
C1orf21	2.34262	0.752876	7.2892	0.146
MT2A	2.35425	0.756444	7.32705	0.147
FLRT2	0.442242	0.138048	1.41674	0.147
PCMTD2	0.464624	0.13776	1.56704	0.147
AC008741.2	0.453549	0.142055	1.44808	0.147
DHRS11	0.354973	0.109243	1.15344	0.148
PADI2	0.402865	0.129274	1.25547	0.148
BACE2	2.20842	0.691549	7.05248	0.149
OVGP1	0.42683	0.137175	1.32811	0.149
CBX6	2.49256	0.800007	7.76602	0.149
CP	2.17785	0.683192	6.94243	0.15
TNFSF13	2.19412	0.687646	7.00092	0.15
PILRB	0.453872	0.142169	1.44898	0.15
LARGE1	2.31566	0.744582	7.2017	0.152
AC016888.1	0.450366	0.140928	1.43924	0.152
YDJC	2.24256	0.700815	7.17604	0.152
ADAMDEC1	0.40592	0.1302	1.26552	0.153
VPS9D1-AS1	0.459948	0.144317	1.46589	0.153
MST1	0.466935	0.146782	1.48539	0.153
RAB6B	2.31448	0.74422	7.1979	0.154
AC092171.3	0.466116	0.146493	1.4831	0.154
ATAT1	0.434202	0.139646	1.35007	0.155
KRT17	0.402041	0.129024	1.25277	0.155
UTP14A	0.461587	0.144896	1.47046	0.156
ZNF703	2.29844	0.739269	7.14599	0.156
MAPK6	2.2965	0.738671	7.13974	0.156
HAGLR	2.20306	0.690086	7.03312	0.157
KCNMB1	2.30074	0.739981	7.15345	0.157
STIM1	2.28682	0.735678	7.1085	0.157
FAM8A1	2.28795	0.736026	7.11213	0.158
MOGAT2	0.37572	0.114498	1.23291	0.158
SLC25A4	2.20878	0.691646	7.05376	0.159
ZNF783	0.438123	0.140955	1.36179	0.159
MCM2	0.405414	0.130047	1.26385	0.159
SH3BGRL	2.47104	0.792731	7.70256	0.159
SRCIN1	0.474347	0.141282	1.59259	0.159
RCAN2	2.25784	0.726687	7.01516	0.16
PUS7	0.47986	0.143278	1.60712	0.16
ZNF697	2.44329	0.783326	7.6209	0.16
KIAA1211	0.410364	0.131544	1.28017	0.161
FRMD3	0.421725	0.134954	1.31787	0.162
TCF7L1	2.45852	0.788492	7.6657	0.162
SELENOP	0.422407	0.135157	1.32014	0.162
TNFAIP8L3	2.44918	0.785325	7.63823	0.162
ZNF772	2.44659	0.784445	7.6306	0.162
MT-ND6	2.45318	0.78668	7.64997	0.162
SMG1P7	0.458648	0.143858	1.46227	0.162
TFAP4	0.441906	0.142217	1.37312	0.163
AP000892.3	2.27662	0.732516	7.07559	0.163
AC124944.3	0.465795	0.14638	1.4822	0.163
ATXN7L2	0.437454	0.140732	1.35979	0.164
RGS5	2.4381	0.781566	7.60567	0.164
LENG8-AS1	0.463999	0.145747	1.47719	0.165
FBXL7	2.44242	0.783031	7.61835	0.165
DSC2	2.25322	0.725251	7.00032	0.166
PITX2	0.467434	0.146958	1.48678	0.166
SMPDL3A	0.425124	0.135967	1.32922	0.167
MASP1	0.412715	0.132252	1.28794	0.167
DHX34	0.444619	0.14312	1.38126	0.167
ZBTB7C	2.1056	0.663235	6.68476	0.167
CLMN	2.26978	0.730396	7.05357	0.167
SSBP2	2.08107	0.656388	6.59802	0.168
ROR2	2.24743	0.72345	6.98174	0.168
GPX2	2.25829	0.726828	7.01662	0.168
CDH3	0.443026	0.14259	1.37648	0.169
POLR1B	0.465846	0.146398	1.48234	0.169
MFSD12	2.25659	0.726299	7.01115	0.169
FGFRL1	2.23484	0.719527	6.94136	0.169
TLE4	2.23483	0.719524	6.94133	0.169
SLC12A8	2.22661	0.716961	6.91503	0.17
LEF1	2.42055	0.775606	7.5542	0.17
FEZ1	2.25157	0.72474	6.99504	0.171
DBF4B	0.44525	0.14333	1.38316	0.172
KLHL35	0.452194	0.145634	1.40406	0.173
NUP62CL	2.23967	0.721032	6.95684	0.174
KCNK10	2.24231	0.721856	6.96531	0.174
SH3BGR	2.38406	0.763181	7.44743	0.175
CSE1L	0.446143	0.143626	1.38584	0.175
AC021218.1	0.452659	0.145788	1.40547	0.175
LZTS3	0.454133	0.146276	1.40992	0.175
AHRR	2.23459	0.719449	6.94056	0.175
ST6GALNAC6	2.05335	0.615004	6.85563	0.176
RASSF3	2.39037	0.765332	7.46585	0.176
CNN1	2.21691	0.713928	6.88399	0.177
CHP2	0.425155	0.135977	1.32932	0.177
KIAA0513	2.07911	0.65584	6.59111	0.178
PCDH7	2.35678	0.75387	7.36788	0.179
CCNG2	0.452682	0.145796	1.40554	0.18
KAT2B	0.453766	0.146154	1.40881	0.181
SOCS2	2.0772	0.655304	6.58435	0.181
C1orf210	2.0591	0.616368	6.87885	0.181
RRP7BP	0.486526	0.153666	1.5404	0.181
CHAF1B	0.451908	0.145539	1.4032	0.181
ARHGEF25	2.33611	0.746799	7.30774	0.182
FAS	2.03089	0.609659	6.76528	0.183
SLC35C2	0.484019	0.152788	1.53333	0.184
GRB7	0.454052	0.146249	1.40967	0.184
WASL	2.35252	0.752412	7.35546	0.184
FKBP5	0.472885	0.148877	1.50205	0.184
WNT3	0.455505	0.14673	1.41406	0.185
PDLIM2	2.20271	0.709486	6.83868	0.185
PPP1R35	2.19192	0.706102	6.80427	0.185
SLC2A4	2.19415	0.7068	6.81137	0.186
CRYAB	2.34372	0.749402	7.32985	0.186
HSPD1	0.474408	0.149413	1.50632	0.186
XPO5	0.456525	0.147067	1.41715	0.187
PLCG2	2.1839	0.703584	6.77875	0.187
GCNT3	2.01757	0.606473	6.71191	0.187
LRRC6	0.455588	0.146757	1.41431	0.187
FAM214A	0.47258	0.14877	1.50119	0.188
SALL2	2.33784	0.747391	7.31276	0.188
ENGASE	0.478917	0.150997	1.51898	0.188
GTF3A	2.1878	0.704809	6.79116	0.188
DDX27	0.492761	0.147946	1.64123	0.188
GALNT17	2.3198	0.741213	7.26039	0.188
SLC22A11	0.509011	0.153817	1.68441	0.191
NR1D1	2.30792	0.737138	7.22594	0.191
LDHD	1.99675	0.601468	6.6288	0.192
C7orf31	0.494764	0.14867	1.64654	0.192
LITAF	0.434934	0.138876	1.36213	0.193
DDX60	0.461354	0.14866	1.43177	0.193
SLC2A13	2.1424	0.690507	6.6471	0.194
CD22	0.463052	0.14922	1.43692	0.194
HSPB7	2.06346	0.65145	6.53596	0.194
IGKV3-20	0.461301	0.148643	1.43161	0.194
CFL2	2.30738	0.736952	7.22437	0.195
MFAP4	2.1593	0.695842	6.70062	0.195
EME1	0.481396	0.151868	1.52595	0.196
AOX1	2.30898	0.737499	7.22899	0.196
LINC00265	0.501244	0.151012	1.66374	0.196
KCNMA1	2.03894	0.644547	6.44992	0.197
IQGAP2	2.01857	0.638785	6.37872	0.197
PRUNE2	2.14771	0.692186	6.66391	0.197
PDCD4	0.466998	0.150517	1.44891	0.198
NPR1	2.15377	0.694099	6.68311	0.198
AC015922.4	2.08074	0.670935	6.45291	0.198
CDKN2B	0.466866	0.150474	1.44851	0.199
CLIP4	2.28949	0.730808	7.17258	0.199
OSBPL1A	2.29066	0.731209	7.17595	0.199
RNASEL	1.99232	0.63132	6.28733	0.2
CKAP2	0.467203	0.150585	1.44954	0.2
MET	0.49757	0.149684	1.65398	0.201
ZNF767P	0.496901	0.157296	1.56972	0.202
IGLV6-57	0.467954	0.150832	1.45183	0.203
TRIB3	0.472529	0.152332	1.46577	0.204
ZNF251	0.49563	0.148983	1.64884	0.204
RETSAT	2.12798	0.685945	6.60154	0.205
IGKV1-5	0.469794	0.151435	1.45743	0.205
E2F2	0.443335	0.141347	1.39052	0.205
MTMR10	0.487822	0.15412	1.54406	0.207
NPFFR1	0.471398	0.151961	1.46232	0.207
DUS1L	2.05417	0.648839	6.50332	0.207
RIMKLA	0.445226	0.141901	1.39694	0.209
C3orf18	0.491722	0.155485	1.55507	0.21
U91328.2	0.446531	0.142282	1.40137	0.211
TNFSF10	1.98952	0.630524	6.27764	0.211
FHL1	2.09642	0.675928	6.50213	0.212
GSN	1.98382	0.628896	6.25785	0.212
RELL1	2.02472	0.640528	6.4002	0.213
C15orf62	0.479719	0.154682	1.48776	0.213
RAD54B	0.494807	0.156564	1.5638	0.213
MMP7	0.477425	0.153933	1.48074	0.213
PLIN4	2.09231	0.674621	6.48923	0.214
POU5F1B	0.5237	0.159116	1.72366	0.214
CPNE5	0.453023	0.144174	1.42349	0.215
FAM89A	2.07069	0.667728	6.42141	0.216
SLC22A18AS	2.00983	0.636305	6.34826	0.217
TTLL6	0.464791	0.147575	1.46388	0.217
IGHV3-43	0.479595	0.154642	1.48738	0.217
PDLIM3	2.09209	0.67455	6.48852	0.217
CSRP1	2.0746	0.668975	6.43365	0.218
AGL	2.06174	0.664869	6.39341	0.218
FERMT2	2.2173	0.705923	6.96452	0.218
ITGA8	0.45897	0.145897	1.44385	0.219
FBXO41	0.500747	0.158638	1.58063	0.219
TCFL5	0.52194	0.158482	1.71895	0.219
SPTBN5	0.509142	0.161562	1.6045	0.219
LEMD1	1.99773	0.632864	6.30616	0.22
UST	2.07325	0.668544	6.42942	0.221
CXCL13	0.499188	0.158094	1.57621	0.221
RNF43	0.503873	0.159728	1.5895	0.221
MMP11	0.481553	0.15528	1.49339	0.221
MITF	2.19704	0.698913	6.9064	0.221
ATP6V1E2	0.517083	0.15673	1.70595	0.221
IGHA2	0.459014	0.145909	1.444	0.221
NPTXR	2.18305	0.694068	6.86636	0.221
FAM86HP	0.523175	0.158927	1.72225	0.221
GLIPR2	1.91859	0.582408	6.32027	0.222
PRDM6	2.18849	0.695951	6.88191	0.222
PDE1C	1.96697	0.624075	6.19952	0.223
ARRDC1	1.99878	0.633161	6.30979	0.223
GNPDA1	0.459361	0.146009	1.4452	0.224
SRM	2.00381	0.634593	6.32728	0.224
BIRC3	0.484289	0.156171	1.50179	0.225
AEN	1.98237	0.628482	6.25283	0.226
TCP11L2	1.8944	0.576423	6.22591	0.228
FAXDC2	2.0561	0.663064	6.37576	0.228
CLDN1	2.18231	0.693811	6.86424	0.229
RHBDF2	2.16549	0.687976	6.81616	0.229
FAM189A1	0.493594	0.159191	1.53046	0.23
AGR3	1.94319	0.617242	6.11751	0.23
CDA	1.97594	0.626644	6.23056	0.23
AL590617.2	0.495337	0.159755	1.53584	0.231
COX7A1	2.04367	0.659082	6.33695	0.232
LRRN2	0.493359	0.159115	1.52973	0.233
FBLIM1	1.95907	0.621809	6.17224	0.233
NEK5	0.508716	0.161414	1.60328	0.233
AOC3	2.02764	0.65394	6.28701	0.236
PDE3A	2.14604	0.681218	6.76065	0.237
AHCY	0.498477	0.160769	1.54557	0.237
ACAA2	1.9156	0.609273	6.02282	0.238
ZBTB12	0.508833	0.161454	1.60361	0.238
NEURL1	0.466022	0.147928	1.46812	0.238
C7	0.514105	0.163287	1.61865	0.239
GLI3	2.12974	0.675548	6.71423	0.239
BOP1	2.00296	0.645996	6.21031	0.239
GIMAP6	0.501615	0.161781	1.55529	0.239
IPO4	2.01547	0.650028	6.24917	0.239
MMP28	1.87777	0.572282	6.16132	0.24
FLNC	2.00779	0.647553	6.2253	0.24
IGHV3-73	0.470506	0.149213	1.48362	0.24
SMYD5	0.544	0.166423	1.77822	0.241
SVIL	2.13264	0.676557	6.72248	0.242
FAM46A	1.90438	0.606018	5.98442	0.242
AKR1B10	0.473529	0.150077	1.4941	0.242
AC087741.1	0.515446	0.163753	1.62247	0.242
PRICKLE2	2.12917	0.675349	6.7126	0.243
DMD	2.11071	0.668918	6.66012	0.243
NANP	0.514297	0.163354	1.61919	0.243
CCDC150	0.529948	0.161367	1.74041	0.244
ELMSAN1	2.00317	0.646064	6.21096	0.244
TWIST2	2.00713	0.647343	6.22327	0.244
SLC9A1	1.91136	0.608044	6.0083	0.245
NOP56	0.517158	0.164347	1.62737	0.245
ACTR3B	0.505434	0.163011	1.56716	0.246
NSMF	1.97839	0.638063	6.13424	0.246
AKAP12	2.11378	0.66999	6.66886	0.246
SPTLC3	0.51684	0.164237	1.62646	0.247
MAOB	1.99592	0.643728	6.1885	0.248
AC122688.3	0.524163	0.166774	1.64742	0.248
AL390879.2	0.507222	0.163585	1.57272	0.249
ANKRD65	1.91616	0.609434	6.02472	0.249
TFPI	0.517447	0.164447	1.62819	0.249
MSRB3	2.09723	0.664219	6.62189	0.25
HSD17B6	1.98571	0.640428	6.15686	0.25
PRDM8	1.88438	0.600196	5.91619	0.25
MC1R	1.98884	0.641441	6.16656	0.25
SPARCL1	1.98263	0.639433	6.14734	0.251
TMEM161A	0.509679	0.164374	1.58038	0.252
GNAQ	1.96482	0.633667	6.09232	0.252
IL20RA	1.98153	0.639078	6.14394	0.252
PAFAH2	1.86625	0.569404	6.11675	0.253
TMEM47	2.10176	0.665797	6.63472	0.253
TSHZ3	2.1003	0.665288	6.63058	0.253
TRAF3IP3	0.506055	0.16321	1.56909	0.253
RBP5	0.505248	0.162951	1.56658	0.254
CPED1	0.506579	0.163379	1.57072	0.255
ANKRD33B	0.52056	0.165527	1.63709	0.255
TAGLN	1.97647	0.637443	6.12832	0.255
S100A2	1.97632	0.637393	6.12785	0.255
COL7A1	0.506703	0.163418	1.57111	0.255
APOBEC1	0.486928	0.153877	1.54083	0.256
CAD	0.553902	0.169979	1.80497	0.257
ZP3	1.96882	0.634963	6.10466	0.257
PDE5A	1.9628	0.633015	6.08612	0.258
SND1	1.96638	0.634175	6.09715	0.258
MPP7	0.512199	0.165181	1.58824	0.258
KIF21B	0.515005	0.16608	1.59701	0.259
ZNF598	0.514368	0.165876	1.59502	0.26
KIF13B	1.96414	0.633448	6.09024	0.26
LINC00174	0.548121	0.167903	1.78934	0.26
IGLV7-43	0.509765	0.164401	1.58064	0.261
WDR27	0.530559	0.168986	1.66578	0.261
NTN4	1.8848	0.60032	5.91764	0.261
IGKV3-15	0.510734	0.164712	1.58367	0.261
EPB41L4A	0.521532	0.168163	1.61745	0.262
ITPKA	1.84383	0.563771	6.03029	0.262
GVINP1	0.512735	0.165353	1.58991	0.262
BMX	0.526057	0.16743	1.65285	0.262
SLC46A3	1.88013	0.598958	5.90175	0.262
SIPA1L2	1.8779	0.598305	5.89415	0.263
MSX1	0.536379	0.170994	1.68253	0.263
AL662899.2	0.548715	0.168117	1.79095	0.263
GINS1	0.516493	0.166555	1.60166	0.263
TCEAL7	1.94327	0.626674	6.02596	0.264
PTGDR2	1.78952	0.511166	6.26486	0.264
CBFB	2.05077	0.647976	6.49044	0.264
BMP2	0.514397	0.161528	1.63813	0.264
RPS21	0.532751	0.169743	1.67208	0.265
ASB2	1.89083	0.602076	5.93817	0.266
SNHG17	0.542012	0.172934	1.69878	0.266
C16orf45	1.9483	0.628307	6.04142	0.266
APOBEC3B	1.94711	0.627922	6.03778	0.266
CLEC3B	1.94489	0.627198	6.03092	0.267
BICDL1	1.94245	0.626406	6.02343	0.267
TOMM34	0.532276	0.169579	1.67071	0.268
LEPR	1.91987	0.619052	5.95409	0.268
CASP7	1.87387	0.597129	5.88047	0.268
WWTR1	2.05557	0.649658	6.50399	0.268
AC016394.1	0.534	0.170174	1.67568	0.268
ITGAL	0.515799	0.166333	1.59949	0.268
FAM71E1	0.517078	0.166742	1.60349	0.269
CDKN2B-AS1	1.81636	0.55682	5.92498	0.271
EGFL6	0.537038	0.171221	1.68443	0.273
CCL28	0.509672	0.160226	1.62125	0.273
FFAR4	1.79822	0.5522	5.85583	0.274
SLC52A2	1.92518	0.620784	5.97038	0.274
LIX1L	1.92372	0.620307	5.96589	0.274
TLR3	0.520012	0.167678	1.61268	0.275
MAGI2-AS3	2.02833	0.640112	6.42718	0.277
PLPP7	1.92066	0.619309	5.95651	0.277
IGHV1-24	0.521083	0.16802	1.61604	0.277
KLF8	0.538002	0.171553	1.6872	0.278
PLCG1	0.555806	0.170662	1.81012	0.279
POPDC2	1.99642	0.628907	6.33749	0.28
COMP	1.96771	0.618803	6.25704	0.28
MPP2	1.90128	0.61298	5.89717	0.281
TTC22	1.81025	0.555267	5.90166	0.281
PLA2G4A	1.84365	0.588268	5.77806	0.281
LPP	2.0098	0.63361	6.37508	0.282
MAGI2	0.539859	0.172193	1.69256	0.282
ASIC1	0.562676	0.173126	1.82875	0.282
C2orf88	1.83174	0.58476	5.73787	0.283
CHRNA3	1.90028	0.612655	5.89413	0.283
HDAC9	0.542322	0.173041	1.69967	0.284
PITPNM3	1.90089	0.612855	5.896	0.284
AGAP3	1.88496	0.607638	5.84735	0.284
B4GALNT2	1.76542	0.543784	5.73151	0.285
HJURP	1.89903	0.612244	5.8903	0.285
SEPT6	1.81876	0.580928	5.69417	0.285
DGKZP1	0.527644	0.170107	1.63667	0.285
EFNA5	1.79824	0.574845	5.62527	0.286
GABARAP	1.87947	0.605837	5.8306	0.286
AC025580.1	0.528137	0.170263	1.63822	0.286
RCN1	0.541856	0.17288	1.69833	0.287
MMP10	0.504631	0.158829	1.60331	0.288
STS	1.77842	0.547129	5.78067	0.289
RET	0.546691	0.174543	1.71231	0.289
MSRA	1.82772	0.583573	5.72431	0.29
ARHGEF26	1.88167	0.606561	5.83733	0.291
NDRG2	1.82718	0.583413	5.72248	0.291
DENND2A	0.509274	0.160115	1.61983	0.291
CHAC1	1.83227	0.584916	5.73965	0.291
WNT2B	0.545871	0.174261	1.70994	0.293
LRP8	0.550005	0.17568	1.72191	0.293
SCIN	1.79948	0.575215	5.62944	0.293
ZNF182	0.549234	0.175416	1.71967	0.293
AHSA2	0.566454	0.17448	1.83901	0.294
NKD1	0.556537	0.177919	1.74087	0.294
PBX4	0.539364	0.173815	1.6737	0.295
DNAJB4	1.97368	0.620908	6.27377	0.295
AC087388.1	0.559598	0.178966	1.74977	0.296
AC232271.1	0.55158	0.17622	1.72647	0.296
GAREM2	0.549236	0.175417	1.71968	0.297
IGHM	0.534713	0.172346	1.65897	0.297
PER1	1.86963	0.60261	5.80066	0.297
MXI1	0.553045	0.176723	1.73073	0.299
BCL2	0.551838	0.176309	1.72723	0.299
LRRK2	1.95163	0.613137	6.21211	0.3
DDX56	1.83241	0.590351	5.68767	0.301
SCARA3	1.8617	0.600004	5.77654	0.301
MGP	1.94113	0.609433	6.1828	0.302
C11orf86	0.515897	0.161941	1.6435	0.303
BVES	1.84283	0.593788	5.71923	0.303
MIR17HG	0.57162	0.17633	1.85306	0.303
MAP1A	1.9117	0.599034	6.10082	0.303
ABCG2	1.80183	0.575911	5.63731	0.304
ITM2C	1.74513	0.538537	5.65509	0.304
RTEL1-TNFRSF6B	0.558742	0.178673	1.74728	0.304
FBL	0.545166	0.175642	1.69211	0.304
ZSCAN18	1.93812	0.608368	6.17439	0.305
PTGFR	0.540717	0.174242	1.67799	0.306
LYAR	0.570057	0.17577	1.84881	0.307
WFDC1	1.79158	0.572867	5.60298	0.307
SCML1	0.560299	0.179206	1.75181	0.307
SPTBN2	0.588898	0.182505	1.90023	0.308
SLC22A5	0.526192	0.164757	1.68052	0.308
ANTXR2	1.76053	0.563602	5.49937	0.308
ZNF233	0.574806	0.17747	1.86174	0.308
CD36	1.78082	0.569664	5.56701	0.309
AJUBA	0.578957	0.178954	1.87306	0.309
IGLV3-10	0.545666	0.175799	1.69371	0.309
TCF21	0.54406	0.175294	1.6886	0.31
GRINA	1.8323	0.590314	5.68733	0.31
KLF4	0.527504	0.165114	1.68526	0.31
CLIP3	1.84106	0.593205	5.71387	0.31
SLC22A17	1.84106	0.593205	5.71387	0.31
CBX8	0.585836	0.181412	1.89185	0.311
FOXP2	1.83792	0.592171	5.70437	0.311
HSPA2	1.7826	0.570194	5.57296	0.311
PCSK6	1.79232	0.573087	5.60545	0.311
ARID3A	0.55845	0.178574	1.74643	0.312
PDK4	0.560589	0.179305	1.75266	0.313
S100B	0.549005	0.176847	1.70433	0.313
PORCN	0.546378	0.176022	1.69597	0.313
RPL28	1.78366	0.57051	5.57651	0.313
SNX24	1.73404	0.555651	5.41148	0.314
RUVBL1	0.546035	0.175915	1.69488	0.314
CCT6A	0.56426	0.180559	1.76335	0.314
TIAM1	1.80976	0.582862	5.61922	0.314
MIR100HG	1.91129	0.598888	6.09967	0.314
IGKV1-16	0.546482	0.176055	1.6963	0.315
AL031985.3	0.546008	0.175906	1.69479	0.315
IGHV1-18	1.77766	0.568721	5.55646	0.316
E2F5	0.576707	0.178149	1.86692	0.316
RASSF6	1.82498	0.587897	5.66519	0.316
ABALON	0.564437	0.180619	1.76387	0.316
CLEC10A	1.72943	0.534456	5.5962	0.317
TSEN2	0.564633	0.180687	1.76444	0.317
MCM7	0.548458	0.176675	1.70259	0.317
PSAT1	0.547716	0.176443	1.70023	0.317
THEM6	1.77993	0.569397	5.56403	0.317
MICALCL	0.563371	0.180256	1.76076	0.318
IGLV3-19	0.548834	0.176793	1.70379	0.318
ATP5A1	1.7282	0.534136	5.5916	0.318
REEP1	0.580168	0.179387	1.87636	0.318
ALDH6A1	1.82181	0.586849	5.65561	0.318
BEST4	0.549837	0.177108	1.70699	0.319
TTI1	0.578681	0.178855	1.8723	0.319
HOXD13	1.73858	0.557018	5.42652	0.319
SLC36A1	0.564688	0.180705	1.7646	0.32
DTNB	0.579146	0.179022	1.87357	0.32
PLCD1	1.70346	0.527665	5.4993	0.321
FCRL5	0.550975	0.177465	1.71062	0.322
SIGMAR1	1.74289	0.537958	5.64669	0.322
CCNI2	0.531215	0.166122	1.69869	0.322
NEO1	1.76739	0.565653	5.5222	0.322
ABCC1	0.578368	0.185363	1.80462	0.323
LGALS9C	0.553359	0.178211	1.71822	0.323
CDC14A	0.56603	0.181163	1.76852	0.324
NECTIN3	1.74354	0.558509	5.44296	0.324
ANO9	0.572289	0.183296	1.78681	0.324
ARMCX1	1.8072	0.582015	5.61151	0.325
DDR2	1.89394	0.59275	6.05147	0.325
VILL	0.542685	0.169216	1.74042	0.325
LYVE1	1.74379	0.558584	5.44379	0.326
NKD2	0.571658	0.183081	1.78496	0.326
SNAI1	1.79005	0.576325	5.55984	0.327
NOTUM	0.572169	0.183255	1.78646	0.327
GRAMD2B	1.7109	0.54867	5.33506	0.328
CA1	0.541222	0.168823	1.73508	0.329
DPT	0.586591	0.181681	1.89391	0.329
RHOJ	1.79872	0.579203	5.58594	0.329
MFAP2	0.582268	0.186687	1.81607	0.33
CCL21	1.74317	0.558395	5.44171	0.331
AIF1L	1.78336	0.574104	5.53973	0.331
AC104958.2	1.79201	0.576976	5.56574	0.331
RNF150	1.87815	0.587157	6.00768	0.332
IGHV3-11	0.558275	0.179746	1.73395	0.332
CGRRF1	1.73544	0.556071	5.4161	0.332
USP2	1.74296	0.558333	5.44102	0.333
TLX1	0.57562	0.184429	1.79656	0.333
ACTR5	0.584933	0.18759	1.8239	0.333
PPP2R3B	1.73952	0.5573	5.42963	0.334
IGHV4-59	0.560407	0.180411	1.74078	0.335
RPS6KA5	0.573276	0.183632	1.7897	0.335
BTNL3	0.559211	0.180038	1.73695	0.335
FBXL6	1.73892	0.55712	5.42764	0.335
SERPINE1	1.78549	0.574809	5.54611	0.335
SPEG	1.78713	0.575356	5.55106	0.336
IGKV1-17	0.560425	0.180417	1.74084	0.336
RPLP0P2	1.78159	0.573515	5.53441	0.336
BCAR3	1.73693	0.55652	5.42104	0.338
AC008764.6	0.579407	0.185716	1.80766	0.338
EPHB6	0.564203	0.181592	1.75297	0.338
AC012360.3	0.591824	0.183549	1.90824	0.338
EDIL3	0.578181	0.1853	1.80407	0.339
FXYD5	1.6592	0.515969	5.33548	0.339
COL4A5	1.6697	0.518756	5.37417	0.339
JAM3	1.85756	0.579855	5.95069	0.339
AC012676.5	0.579565	0.18577	1.80813	0.339
FAM151A	0.563067	0.181239	1.74932	0.34
WDR78	0.57947	0.185738	1.80785	0.34
AHCYL2	1.65694	0.515367	5.32715	0.34
SNHG11	0.584006	0.187276	1.82118	0.34
FGF18	1.76982	0.569597	5.49906	0.34
HSF4	1.76272	0.567234	5.47778	0.34
C16orf54	1.67334	0.519722	5.38762	0.34
TSPAN7	1.7746	0.571188	5.5134	0.341
PPP1R14A	1.70643	0.528443	5.51032	0.341
IGLV3-25	0.563457	0.18136	1.75057	0.341
HLF	1.83584	0.572141	5.89071	0.343
IGFL4	0.608362	0.189439	1.95368	0.343
RTL5	1.77158	0.570186	5.50436	0.343
PTPRC	0.573221	0.184388	1.78201	0.343
RPP40	0.565097	0.18187	1.75584	0.343
DTX2	1.72522	0.552995	5.38232	0.344
RIMKLB	1.8451	0.57543	5.91626	0.344
PRR19	0.583671	0.187163	1.82019	0.344
STOM	1.76471	0.567896	5.48374	0.344
SLC25A20	1.647	0.51272	5.29065	0.345
DRAIC	1.71968	0.551323	5.36403	0.345
HK2	1.72005	0.551433	5.36522	0.345
TGIF1	1.76562	0.5682	5.48647	0.346
ARMC2	0.584704	0.187513	1.82323	0.346
GPM6B	1.8119	0.563627	5.82476	0.349
CXCL12	1.75309	0.564023	5.44896	0.349
CILP	1.76034	0.566438	5.47064	0.349
LINC00641	1.7951	0.557642	5.77856	0.349
TDRP	0.588711	0.182438	1.89972	0.349
ECSCR	1.75498	0.564651	5.4546	0.349
ZNF542P	1.69694	0.544441	5.28911	0.35
GRHL1	1.65111	0.513814	5.30572	0.35
C5orf66	0.588905	0.188935	1.8356	0.35
TPSAB1	0.571103	0.183733	1.77518	0.35
UGT2A3	0.583125	0.187442	1.81408	0.351
CBX4	1.7823	0.553083	5.74346	0.351
SMPD3	0.570345	0.183498	1.77274	0.351
GNB1L	1.71243	0.549133	5.34011	0.351
ZNF518B	1.80122	0.559825	5.7954	0.351
HCLS1	0.577947	0.185848	1.7973	0.351
NBEAL1	1.74952	0.562828	5.43825	0.352
TARBP1	0.592379	0.183747	1.90976	0.352
TMTC1	1.82307	0.5676	5.85551	0.355
TMEM25	1.69729	0.544547	5.29027	0.355
LPAR1	1.69054	0.542497	5.26808	0.356
CD1D	0.55916	0.173606	1.80098	0.356
DCAF13	0.59551	0.184863	1.91835	0.356
NAA10	1.67922	0.521277	5.40934	0.356
MAN1C1	1.68097	0.539589	5.23671	0.356
SLIT2	0.595319	0.184795	1.91782	0.357
PCSK9	0.577527	0.185718	1.79593	0.357
CLIC6	0.588831	0.18891	1.83538	0.357
ISX	0.590973	0.189635	1.84169	0.359
XRCC2	0.607333	0.189073	1.95085	0.36
PTK2B	1.73506	0.557997	5.39506	0.36
C8G	1.69767	0.544663	5.29152	0.36
ACHE	1.72483	0.554571	5.36455	0.36
SECTM1	1.64695	0.512706	5.29046	0.361
PLSCR4	0.590855	0.189595	1.84134	0.361
IGLL5	0.57627	0.18533	1.79187	0.361
SRMS	0.578444	0.186001	1.7989	0.361
RBPMS2	1.68699	0.541418	5.25643	0.362
NOP16	1.65903	0.515923	5.33484	0.362
WSCD1	1.67962	0.539176	5.23227	0.363
CD44	1.66558	0.517664	5.35898	0.363
SAMD10	0.600897	0.192984	1.87102	0.363
LTBP4	0.578391	0.185984	1.79873	0.363
AC092119.2	0.591894	0.189946	1.84441	0.363
KANK2	1.72941	0.556105	5.3782	0.364
ROBO3	0.608244	0.189397	1.95336	0.364
DIRC2	0.579751	0.186404	1.80314	0.365
DOCK10	0.592094	0.190192	1.84327	0.365
TPM2	0.606942	0.188934	1.94977	0.365
GTF2IRD1	0.607099	0.18899	1.95021	0.366
ZNF667-AS1	1.72613	0.555009	5.36845	0.366
AC008669.1	0.598659	0.185985	1.92699	0.366
RRP9	1.65926	0.515985	5.3357	0.367
ADH1B	0.584805	0.187958	1.81954	0.368
LIF	1.68178	0.539834	5.23936	0.368
MDGA1	1.71898	0.552612	5.34714	0.368
TRIM40	1.62703	0.476136	5.55979	0.369
LINC02253	0.581904	0.187066	1.81012	0.369
AKT3	1.79198	0.556532	5.77001	0.369
FOXQ1	0.6165	0.192331	1.97614	0.371
TRPC6	1.71229	0.550367	5.32722	0.371
PIGZ	0.561871	0.174322	1.81101	0.371
TUBB6	1.70423	0.54766	5.30326	0.371
MIER1	1.65124	0.530511	5.13956	0.372
CKS2	1.67618	0.538129	5.22101	0.372
RTKN	1.68966	0.542763	5.26003	0.373
ARMC10	1.70571	0.54816	5.30768	0.373
REEP3	1.65708	0.532297	5.15859	0.373
BRAT1	1.68861	0.54241	5.25693	0.373
HELZ2	0.612012	0.190737	1.96375	0.373
PTGER3	1.70037	0.546365	5.29181	0.373
LINC00483	0.598258	0.192095	1.86321	0.374
NACC2	1.65738	0.532389	5.15957	0.376
CELSR3	0.617047	0.192525	1.97765	0.377
AZGP1	0.603781	0.193955	1.87956	0.377
OTUD7A	0.602073	0.19338	1.8745	0.377
ROR1	0.602665	0.19358	1.87626	0.378
EXOSC5	0.588478	0.189085	1.83148	0.378
AL391056.1	0.587226	0.188701	1.82741	0.378
RPL36A	0.604275	0.194122	1.88103	0.378
DPF3	0.602975	0.193684	1.87718	0.379
CEP85L	0.610302	0.196147	1.89892	0.379
NR6A1	0.61663	0.192377	1.9765	0.38
RETNLB	0.574568	0.177654	1.85826	0.382
RAB15	1.6453	0.52869	5.12022	0.382
SLC17A5	1.60892	0.502498	5.15151	0.383
FMO4	1.68882	0.542479	5.25753	0.383
ABCA5	0.604376	0.194156	1.88133	0.383
PPP1R3C	1.68077	0.539768	5.23369	0.384
PDX1	1.64609	0.528932	5.12278	0.384
CBWD6	0.608534	0.195553	1.89367	0.384
PRELP	1.75751	0.544235	5.67554	0.385
ASNS	0.606854	0.194989	1.88868	0.385
CFB	0.591528	0.190019	1.84142	0.385
UBE2C	0.609719	0.195951	1.89719	0.386
LINC01605	0.621826	0.194221	1.99086	0.386
IMPDH1	0.61096	0.196368	1.90088	0.386
DNTTIP1	1.64784	0.529468	5.12848	0.386
RAE1	0.621322	0.194042	1.98947	0.387
PAPSS2	1.58978	0.497316	5.08205	0.387
TOX2	0.606571	0.194894	1.88784	0.387
GOLGA7B	0.62319	0.194705	1.99464	0.387
AKR1C2	1.63771	0.526361	5.09553	0.388
DENND5B	0.617273	0.192606	1.97827	0.389
CALD1	1.74983	0.541493	5.65456	0.389
NXPH3	1.6785	0.539005	5.22698	0.39
SLC25A22	1.64163	0.527564	5.10828	0.39
ZNF696	0.62373	0.194896	1.99613	0.39
CD180	0.607079	0.194755	1.89235	0.391
NXPE3	0.611275	0.196474	1.90182	0.391
AC005550.3	0.592485	0.182294	1.92567	0.391
GSTP1	1.62456	0.506708	5.20848	0.391
CCNYL1	0.610494	0.196212	1.89949	0.392
ZNF710-AS1	1.64145	0.527509	5.10769	0.392
ANLN	1.67396	0.537472	5.21354	0.392
CD302	0.6165	0.192331	1.97614	0.392
MYADML2	0.600472	0.192748	1.87066	0.392
XPOT	0.611283	0.196476	1.90184	0.393
C2orf70	0.613528	0.197229	1.90852	0.393
RHPN1-AS1	0.61999	0.19357	1.98578	0.393
RASSF8	1.73276	0.535391	5.60795	0.393
LDOC1	1.63703	0.526153	5.09334	0.393
MIR4697HG	0.623935	0.194969	1.9967	0.393
IKZF3	0.611309	0.196485	1.90192	0.393
GUCA2A	0.574785	0.177711	1.85907	0.394
RRS1	1.70552	0.525646	5.53377	0.394
DHDDS	1.60943	0.502635	5.15336	0.395
C6orf223	0.597789	0.191931	1.86188	0.395
PPP1R13L	1.63292	0.524889	5.07998	0.395
PRKAR2B	0.605256	0.194202	1.88636	0.396
AC016727.1	0.621494	0.194103	1.98994	0.396
CDKL1	1.63091	0.524273	5.07347	0.397
THBS4	1.66979	0.536067	5.20122	0.397
GCNT2	0.614921	0.197696	1.91267	0.398
LRRC1	0.599998	0.192604	1.86911	0.398
SMIM14	1.61922	0.520672	5.03556	0.399
SHH	0.638641	0.200176	2.03752	0.399
C4orf19	0.598003	0.183708	1.94661	0.4
DOCK2	0.607715	0.194948	1.89444	0.4
ARNT2	0.623117	0.194679	1.99444	0.4
CSF2RB	0.607715	0.194948	1.89444	0.4
CLIC4	0.61509	0.197753	1.91317	0.4
AC006329.1	0.617646	0.198609	1.92079	0.4
PNMA1	1.62086	0.521178	5.04088	0.401
MYH15	0.616666	0.198281	1.91787	0.401
GPRIN2	0.602233	0.193284	1.87643	0.401
ZEB1	1.72815	0.533742	5.59537	0.401
PEX26	1.65521	0.531141	5.15816	0.402
KLHDC8B	1.61852	0.520455	5.03329	0.402
GRHL3	1.61835	0.520403	5.03274	0.403
KLHL13	1.61667	0.519885	5.02731	0.403
CNNM4	0.60475	0.194048	1.8847	0.405
NXPE1	0.617742	0.197978	1.92752	0.405
LIPH	1.58754	0.496708	5.07394	0.405
PPP1R36	1.60685	0.516853	4.99555	0.405
PHYHD1	1.65226	0.530145	5.14948	0.406
TNS1	1.69513	0.521923	5.50553	0.406
P2RX4	0.588907	0.181373	1.91214	0.406
CD79B	0.611316	0.196038	1.9063	0.407
TEK	0.620015	0.199402	1.92786	0.407
AP001972.5	0.607528	0.194891	1.89383	0.408
REEP2	1.63895	0.525637	5.11026	0.409
AHNAK	0.626637	0.195927	2.00419	0.409
ARHGAP15	1.597	0.513806	4.96378	0.409
CPT2	1.58637	0.496393	5.06974	0.41
LTF	0.621522	0.199906	1.93236	0.41
WISP1	0.628935	0.196741	2.01056	0.41
GNG7	0.6321	0.197862	2.01934	0.411
MARCH9	1.58844	0.496953	5.07721	0.411
CEBPB	1.60502	0.516287	4.98964	0.412
KIF18B	0.62235	0.200183	1.93483	0.412
ETV4	0.623028	0.200409	1.93686	0.413
FGFR2	1.59477	0.513115	4.95659	0.413
PABPC1	0.640574	0.200859	2.0429	0.413
IGHV3-48	0.613254	0.196624	1.91269	0.413
LANCL3	0.615794	0.19739	1.92108	0.414
CA12	1.60374	0.515891	4.98551	0.414
SPRY4	1.63673	0.524886	5.10374	0.414
LMTK3	1.62467	0.520795	5.0683	0.414
GSKIP	1.56741	0.491227	5.00133	0.414
ARHGAP24	1.5954	0.513308	4.9586	0.414
KCNH8	0.636901	0.19956	2.03268	0.414
RNF11	1.5857	0.510301	4.92738	0.415
IGLV3-1	0.610477	0.195784	1.90354	0.415
ADCY9	0.627041	0.201749	1.94886	0.415
ZNF415	1.63698	0.524972	5.10449	0.415
SEMA6D	0.615491	0.197299	1.92008	0.416
IGLC3	0.612854	0.196503	1.91137	0.416
PAQR8	0.623328	0.199658	1.94602	0.417
IGHV3-15	0.614336	0.19695	1.91626	0.418
PRKG1	1.63339	0.523755	5.09393	0.418
LIFR	0.630834	0.197414	2.01583	0.419
FOLR2	1.55824	0.488716	4.96833	0.419
IGHV1-69	0.613317	0.196643	1.9129	0.419
TLCD1	1.57426	0.493095	5.02599	0.419
IGKV2D-29	0.616596	0.197632	1.92373	0.419
HECTD2	0.629011	0.202406	1.95476	0.421
MNX1-AS1	1.6206	0.519412	5.05634	0.421
C2CD4A	0.617423	0.197882	1.92646	0.421
FOXF2	1.55597	0.488094	4.96018	0.422
IGKV3D-20	0.615098	0.19718	1.91878	0.422
AP002761.4	0.628616	0.202274	1.95357	0.422
IGKV2-24	0.615854	0.197408	1.92127	0.423
FAM49A	1.57031	0.505514	4.87793	0.423
ANPEP	0.616462	0.197592	1.92329	0.424
FGF2	1.61894	0.518849	5.05148	0.424
CHGA	0.604936	0.185476	1.97302	0.425
DST	0.637025	0.199604	2.03303	0.425
MAOA	1.57526	0.507056	4.89382	0.426
VSTM5	0.618073	0.198077	1.92861	0.426
RIOK3	1.54032	0.483795	4.90412	0.427
CFAP157	0.631294	0.203167	1.9616	0.427
C5orf34	1.61565	0.517733	5.04184	0.427
FER1L4	0.65012	0.204229	2.06952	0.427
NUDCD1	0.642714	0.201615	2.04886	0.428
SLC1A5	0.632833	0.203679	1.96622	0.429
KRT7	0.619553	0.198523	1.93351	0.429
CAND2	1.60363	0.513643	5.00662	0.43
PSMA7	0.635998	0.204732	1.97572	0.43
GZMA	0.624624	0.200047	1.95032	0.431
AP001453.2	1.57611	0.507321	4.89656	0.431
E2F7	0.634261	0.204154	1.9705	0.432
OGT	0.654253	0.205686	2.08107	0.432
HHLA2	0.628531	0.201218	1.9633	0.433
TRAF5	0.649364	0.203963	2.06741	0.433
RHOU	0.635709	0.204636	1.97485	0.433
ARL14	0.635645	0.204615	1.97466	0.434
GABRE	0.650673	0.204424	2.07106	0.434
CCR7	1.56769	0.504699	4.86954	0.434
PXMP2	0.613672	0.187687	2.00649	0.435
ADAM33	1.56864	0.504996	4.8726	0.435
IGHV5-51	0.636226	0.204808	1.97641	0.435
LINC01268	0.62739	0.200876	1.95951	0.436
PCNX2	0.636583	0.204927	1.97748	0.436
AC008443.1	0.639521	0.205903	1.98631	0.437
DNAJB5	1.5909	0.509309	4.96941	0.438
DNAJC2	1.63104	0.498922	5.33207	0.438
FCAMR	0.629308	0.20145	1.96589	0.438
SGK1	1.59311	0.510062	4.97587	0.439
MRPL17	1.55252	0.487149	4.94781	0.439
ADA2	1.54845	0.498692	4.80799	0.439
IMPA1	1.65184	0.506395	5.38822	0.44
ZFPM2	1.595	0.510707	4.98141	0.44
AL031714.1	0.656256	0.206392	2.08667	0.44
NEGR1	1.58667	0.507865	4.95706	0.441
PINK1	1.53237	0.454669	5.16452	0.441
CCR2	0.633118	0.202589	1.97858	0.441
OXTR	0.645984	0.20277	2.05797	0.441
TCF7	0.649448	0.203992	2.06764	0.442
AC073869.1	0.648901	0.203799	2.06611	0.442
HMGN2P46	0.632333	0.202355	1.97596	0.442
WDR66	0.645651	0.207936	2.00478	0.443
CTSW	1.55947	0.502135	4.84321	0.443
ZNF467	1.54443	0.484925	4.91881	0.443
GREM2	1.55568	0.500952	4.83109	0.444
RNASEH2A	0.613179	0.187563	2.0046	0.444
FAM171B	0.642688	0.206954	1.99585	0.444
ATP1A3	0.641664	0.206614	1.99276	0.444
PTN	1.5831	0.50665	4.94666	0.445
RCSD1	0.639776	0.204573	2.00082	0.445
ZNF316	1.57323	0.503278	4.91787	0.445
ACO2	1.53955	0.483583	4.90137	0.446
DAAM2	1.58409	0.506984	4.94952	0.447
DTX2P1-UPK3BP1-PMS2P11	0.661212	0.208137	2.10055	0.447
ITGA7	1.57691	0.504535	4.92859	0.448
ACADM	1.54176	0.496597	4.78664	0.448
ZNF568	1.58365	0.506834	4.94823	0.448
RASL12	1.5482	0.498614	4.80719	0.449
AC040162.1	0.649881	0.209336	2.01755	0.449
ARRDC4	1.5372	0.495169	4.77211	0.45
NPRL3	1.5368	0.495042	4.77082	0.45
A1CF	1.57681	0.504499	4.92829	0.45
HCFC2	0.65104	0.204554	2.07209	0.451
ATP8A1	0.646102	0.208085	2.00614	0.451
MEIS1	1.57685	0.504513	4.92841	0.452
SLC26A2	0.640216	0.204704	2.00229	0.452
TUB	1.61451	0.49298	5.28755	0.452
GRIN2D	1.52552	0.479709	4.85128	0.454
HERC3	1.57056	0.502366	4.91009	0.454
ECE2	1.50083	0.447334	5.03533	0.454
LAS1L	0.652254	0.21012	2.02472	0.455
ZG16	0.625373	0.190624	2.05165	0.455
ZMYND19	1.53113	0.481259	4.87128	0.455
C1QTNF3	1.59856	0.48724	5.24464	0.455
ZEB2	0.654512	0.205778	2.08179	0.456
NTMT1	1.5283	0.480478	4.86119	0.456
ADGRL3	0.645866	0.206381	2.02123	0.457
CA4	0.625358	0.19062	2.05159	0.458
ABCA3	1.56046	0.498911	4.8807	0.458
SNHG4	0.651556	0.20989	2.02261	0.458
IGHA1	1.49991	0.447121	5.03162	0.459
ACVR1C	0.651744	0.209952	2.02318	0.459
IQGAP3	1.53319	0.493908	4.75931	0.46
CASC8	1.52111	0.490114	4.72091	0.46
IGLV2-8	0.652388	0.210165	2.02513	0.461
EVI2B	0.649535	0.207467	2.03355	0.461
PDE1A	1.52302	0.490715	4.72698	0.461
OGFR	0.668662	0.210756	2.12145	0.461
ADAM28	0.657597	0.211884	2.0409	0.461
ETHE1	1.50098	0.447371	5.03596	0.461
PMAIP1	0.662338	0.208533	2.1037	0.461
PACSIN2	1.55034	0.495447	4.85131	0.462
CNNM2	1.52877	0.492521	4.74525	0.462
IGHV3-74	0.64234	0.205335	2.0094	0.462
CPA3	0.644884	0.20609	2.01793	0.462
SGCB	1.51756	0.488996	4.70964	0.462
NAT10	0.653493	0.21053	2.02847	0.463
ATIC	0.655418	0.211165	2.0343	0.463
KIAA1683	0.648172	0.207064	2.02897	0.464
IGLV10-54	0.64354	0.205691	2.01342	0.465
PALM	1.55007	0.495353	4.85052	0.465
C17orf97	1.5257	0.491557	4.73549	0.465
TMIGD3	1.50766	0.474757	4.7878	0.465
ZSWIM4	0.661768	0.208332	2.1021	0.466
AC027601.1	0.659439	0.212491	2.04648	0.466
PPP1R12B	1.5475	0.494471	4.84304	0.467
VAMP2	1.51554	0.48836	4.70322	0.467
ESM1	1.52351	0.490868	4.72853	0.467
PDE4C	1.51052	0.475551	4.79795	0.467
ZYG11B	0.656882	0.211648	2.03873	0.468
BEX4	1.54968	0.49522	4.84939	0.469
AC020916.1	0.661268	0.213094	2.05203	0.469
ATAD2	0.663735	0.209025	2.10762	0.47
FOXA2	1.50301	0.473464	4.77132	0.47
FERMT1	0.662945	0.213646	2.05713	0.47
ANK3	0.664653	0.209347	2.1102	0.471
VIP	1.51842	0.489266	4.71236	0.471
PHLDA1	1.51933	0.489552	4.71524	0.471
SKA3	0.659832	0.212621	2.04768	0.473
MAPK15	0.677938	0.214012	2.14754	0.473
SMIM25	1.48655	0.468869	4.71313	0.474
AL022311.1	0.663772	0.213918	2.05964	0.474
PRSS22	1.4984	0.482952	4.64894	0.475
ZNF304	1.54003	0.491912	4.8214	0.476
EPHA1	0.661546	0.213185	2.05288	0.476
MROH6	1.50829	0.486073	4.68022	0.476
PRDX6	1.50069	0.483675	4.65618	0.477
ADCY2	1.5329	0.489462	4.80072	0.477
FAM110B	0.662721	0.213572	2.05645	0.477
GYPC	1.50599	0.485349	4.67296	0.478
CDHR5	0.654368	0.208894	2.04983	0.478
CYYR1	1.49944	0.48328	4.65222	0.478
S100P	1.46692	0.439347	4.89786	0.478
C6orf48	1.50461	0.484914	4.66859	0.479
FAM124A	0.669836	0.211169	2.12475	0.479
PLAU	1.48595	0.468701	4.711	0.479
GSTM5	1.50442	0.484854	4.66799	0.48
LAMA1	0.660765	0.210777	2.07143	0.481
DDX31	0.664785	0.214251	2.06272	0.481
TMEM200B	1.52756	0.48763	4.78529	0.481
BGN	1.52691	0.487404	4.78339	0.481
AC007342.4	0.657943	0.209947	2.06189	0.482
MACC1	1.55205	0.470481	5.12001	0.483
PPA1	0.658001	0.209964	2.06209	0.483
VAT1L	1.49689	0.482474	4.64416	0.484
AKAP6	1.55937	0.47312	5.13957	0.484
FAM114A1	1.4819	0.467566	4.69671	0.484
PDE9A	1.49875	0.48306	4.65002	0.485
GLDN	1.45915	0.461172	4.61679	0.486
FGF7	1.52454	0.48659	4.77654	0.487
STRA6	1.5185	0.484513	4.75908	0.487
GNAL	1.5147	0.483205	4.7481	0.487
IGHV3-72	0.662702	0.211346	2.07799	0.488
ILK	0.675721	0.213234	2.1413	0.488
NIT2	0.669362	0.215755	2.07664	0.488
RNF183	0.658958	0.210246	2.06532	0.488
AC124067.2	0.683504	0.215962	2.16324	0.488
LAGE3	1.47874	0.46668	4.68558	0.488
ACACB	1.484	0.478391	4.60345	0.489
GNL3	0.677297	0.213787	2.14574	0.489
GNG11	1.48607	0.479047	4.60997	0.489
FLNA	1.51539	0.483442	4.75009	0.489
SIM2	1.49251	0.481086	4.6303	0.49
SYTL2	0.671386	0.216419	2.08281	0.49
CDHR2	0.67101	0.216296	2.08166	0.49
POLM	1.49298	0.475721	4.68551	0.491
XPNPEP3	0.670814	0.216231	2.08107	0.491
PBX1	0.675324	0.213095	2.14018	0.491
RPP25	1.48081	0.467261	4.69287	0.491
OSBPL3	0.682835	0.204581	2.27911	0.492
RIPPLY3	0.672248	0.216701	2.08544	0.492
FAM227A	0.674762	0.217525	2.09311	0.492
AL353796.1	0.686601	0.217046	2.17198	0.493
LAPTM4B	1.49174	0.475294	4.68194	0.493
TACR2	0.672573	0.216808	2.08643	0.494
RTL10	0.685243	0.216571	2.16815	0.494
F8	0.672499	0.216784	2.0862	0.494
MAN1A1	1.45997	0.470754	4.52786	0.494
C2orf27A	0.676544	0.213523	2.14362	0.494
WDR74	1.47418	0.465401	4.66954	0.495
SLC7A2	1.48327	0.47816	4.60115	0.496
OXCT1	0.663245	0.211505	2.07983	0.496
AC104825.2	1.51089	0.481896	4.73712	0.496
CAP2	1.50536	0.479989	4.72116	0.497
HSPB8	1.50187	0.478786	4.71109	0.498
EPOP	0.692635	0.219157	2.18904	0.498
IGLV2-23	0.675217	0.217675	2.09449	0.499
PRELID3A	0.664302	0.211815	2.08341	0.499
GBP3	1.44881	0.45825	4.58058	0.499
PAICS	0.686032	0.216847	2.17037	0.5
HMCN2	1.47901	0.47681	4.58774	0.5
ASAP3	1.46849	0.473468	4.55463	0.501
CNTN4	0.682691	0.215677	2.16094	0.502
NBPF1	0.68094	0.219547	2.11199	0.502
NR5A2	1.47525	0.475616	4.5759	0.502
STC1	1.50341	0.479316	4.71553	0.502
SLC16A1-AS1	0.690797	0.218514	2.18384	0.502
IFITM3	1.47209	0.474611	4.56595	0.503
TNFSF12	1.43429	0.454134	4.52994	0.503
SHISA2	0.677691	0.218484	2.10205	0.503
WAS	0.670701	0.213687	2.10513	0.503
MS4A12	1.44348	0.43376	4.80367	0.504
MS4A8	0.670195	0.21354	2.10341	0.505
MYH11	1.49167	0.47527	4.68174	0.506
FUCA1	1.44951	0.458449	4.58304	0.507
MYL9	1.46835	0.473423	4.55419	0.507
CDC6	0.680866	0.219523	2.11176	0.507
IGLV1-51	0.681128	0.219608	2.11256	0.508
LINC01978	0.696822	0.220619	2.2009	0.508
ZNF786	1.48716	0.473712	4.66877	0.509
CENPI	0.682379	0.220017	2.11639	0.509
ALG3	1.45268	0.459343	4.5941	0.51
IGLV2-11	0.671206	0.213835	2.10685	0.51
FAXC	1.47203	0.46848	4.62529	0.51
CTSE	0.664066	0.200123	2.20356	0.51
CASD1	1.4913	0.475142	4.68067	0.511
TSHZ1	1.48664	0.473531	4.66726	0.511
CDIP1	1.464	0.472039	4.54053	0.511
GHR	1.43423	0.454114	4.5297	0.512
SYNJ2BP	1.45411	0.468886	4.50948	0.512
HBB	0.672547	0.214226	2.11141	0.512
SLAMF7	0.676165	0.21528	2.12374	0.512
PABPC3	0.683957	0.220532	2.12122	0.512
GNA13	0.690012	0.222506	2.13979	0.514
RPIA	0.698593	0.21028	2.32087	0.514
ATL1	1.46149	0.471238	4.53263	0.514
CHMP4C	0.692532	0.21912	2.18875	0.514
ADAM23	1.4811	0.471617	4.65133	0.514
LGALS4	0.66577	0.200534	2.21034	0.515
NGFR	1.45823	0.470201	4.52242	0.515
ALPI	1.44892	0.458282	4.58098	0.516
P2RY1	1.44912	0.467295	4.49386	0.516
RBM47	1.45637	0.469607	4.51658	0.516
SLAMF1	0.678882	0.216071	2.13301	0.517
SLC41A2	0.681042	0.216698	2.14039	0.518
NOB1	0.677164	0.215571	2.12715	0.518
ARHGEF37	1.43751	0.455046	4.54113	0.518
NR3C2	0.692228	0.223227	2.1466	0.519
SETBP1	1.47737	0.470328	4.64062	0.52
HSD17B11	1.44422	0.465727	4.47851	0.52
ATOH1	0.681828	0.216926	2.14308	0.52
KAT2A	0.692949	0.223462	2.14882	0.521
SAMD9	1.44236	0.465135	4.47271	0.521
TMEM132A	0.678996	0.216104	2.1334	0.521
TLR7	0.685363	0.21795	2.15518	0.522
RECQL4	0.689646	0.222387	2.13867	0.522
SPDEF	0.671486	0.201909	2.23315	0.522
C14orf132	1.46889	0.467394	4.61629	0.523
AL691432.2	1.43365	0.45395	4.52768	0.523
ECT2	0.690722	0.222737	2.14197	0.523
NXPE2	1.41465	0.448537	4.46172	0.523
LRRC36	1.44768	0.466835	4.48936	0.523
KRT80	0.690864	0.222783	2.14241	0.524
EMCN	1.43833	0.463845	4.46011	0.524
NOV	1.44296	0.465327	4.47459	0.524
SGPP1	1.41532	0.456464	4.38838	0.524
SPATA6L	1.44676	0.466539	4.48646	0.524
ALG1L	1.44439	0.465784	4.47906	0.524
GGTA1P	0.692975	0.22347	2.1489	0.525
TSPAN18	1.46968	0.467668	4.61856	0.525
CLEC5A	0.691861	0.223108	2.14547	0.525
AL031727.1	1.4337	0.453964	4.52786	0.525
SULT1A2	0.680902	0.216657	2.13991	0.527
ADCY5	1.4418	0.464956	4.47096	0.527
TRIM36	0.687145	0.218466	2.16129	0.527
GPR183	1.43416	0.462509	4.44708	0.527
MELTF-AS1	1.43504	0.462792	4.44983	0.527
ACAN	0.693979	0.223797	2.15198	0.528
CAPN10-AS1	0.701251	0.222165	2.21346	0.528
PLCD3	1.44255	0.465193	4.47328	0.528
HLA-DOB	0.694343	0.223915	2.1531	0.529
FGFR1	1.45977	0.464236	4.59016	0.529
APLP1	1.45882	0.463909	4.58746	0.53
SLC19A1	1.43972	0.46429	4.46445	0.53
HILPDA	0.707163	0.224225	2.23026	0.531
SULT2B1	1.42696	0.452048	4.50442	0.531
CDC25B	1.41024	0.447276	4.44644	0.533
GTPBP3	0.699501	0.22559	2.16898	0.533
UCHL1	1.45276	0.461808	4.57011	0.534
RASGRP2	1.43454	0.46263	4.44825	0.534
CMTM8	0.697715	0.22501	2.16348	0.534
TSPYL5	1.45676	0.463195	4.58156	0.535
LRRC75A	1.45146	0.461357	4.56639	0.535
TOP1MT	0.71818	0.217353	2.37302	0.537
PLCD4	0.70471	0.22337	2.22328	0.537
LINC01133	0.691844	0.219823	2.17742	0.537
SUGCT	1.44862	0.46037	4.55826	0.537
ADGRD1	0.704841	0.223416	2.22366	0.537
EPHB3	1.4205	0.450206	4.48198	0.537
EVI2A	1.42841	0.460665	4.42912	0.538
RGS10	0.699457	0.225576	2.16885	0.538
ANKRD44	0.702747	0.222686	2.21771	0.538
SRPX2	0.705232	0.223552	2.22477	0.538
HIST1H1C	1.41087	0.447455	4.44861	0.539
CKMT1B	1.41277	0.447997	4.45518	0.539
FOXO1	1.44624	0.459544	4.55146	0.539
CKMT1A	1.41277	0.447997	4.45518	0.539
CCT6P3	0.712264	0.215218	2.35724	0.539
ITIH5	0.704875	0.227332	2.18557	0.541
ANKRD13B	0.701901	0.226368	2.17639	0.541
S1PR1	1.41694	0.456983	4.3934	0.541
URB2	1.41162	0.447671	4.45122	0.542
CIPC	1.42024	0.458046	4.4037	0.545
USPL1	1.44194	0.458053	4.53918	0.546
ZDHHC2	0.704871	0.22733	2.18556	0.546
DCLK2	1.43722	0.456413	4.5257	0.547
RHOF	1.40801	0.446638	4.43873	0.547
SQOR	1.39996	0.423248	4.6306	0.547
PLXNA3	0.718779	0.228266	2.26334	0.547
TMTC4	0.709984	0.225208	2.23828	0.547
HACD4	1.40801	0.45411	4.36564	0.548
MGAT4A	1.40619	0.453524	4.35999	0.55
ADAMTSL1	1.40491	0.453114	4.35604	0.551
PERM1	1.41516	0.448742	4.46289	0.551
NT5DC2	1.40513	0.445812	4.42876	0.552
BNC2	1.4557	0.435668	4.86392	0.553
MSH5	0.716169	0.227359	2.2559	0.553
CLCN2	0.718301	0.2281	2.26198	0.553
AC092868.1	1.38894	0.441161	4.37292	0.553
ETV7	1.39731	0.443569	4.40176	0.553
B3GNT7	1.38756	0.420219	4.58174	0.554
LHFPL2	1.40123	0.451926	4.34461	0.554
CCNB1IP1	1.4059	0.453431	4.35909	0.555
CD14	1.39051	0.42094	4.59333	0.555
NBEAL2	1.40052	0.451697	4.34241	0.556
SYNC	1.4078	0.446176	4.44196	0.557
EPHA7	0.711642	0.229519	2.2065	0.558
CPEB3	1.40338	0.452619	4.35127	0.558
BIN2	0.715889	0.230889	2.21966	0.558
HOMER1	0.718619	0.22821	2.26288	0.558
NAALADL1	1.40324	0.452573	4.35083	0.559
PKIA	1.40401	0.452823	4.35323	0.559
HSPA1B	0.718081	0.228023	2.26135	0.559
FAM162A	1.38186	0.418821	4.55934	0.56
ATP2A3	0.705921	0.223866	2.22599	0.56
RARRES3	0.710202	0.22509	2.24083	0.56
TUBAL3	1.37997	0.438574	4.34207	0.561
STX12	1.3875	0.440746	4.36796	0.561
BHLHE41	0.719686	0.232112	2.23145	0.561
RNF138	0.714034	0.226182	2.25414	0.562
CLIC5	1.39451	0.449758	4.32378	0.562
MCM10	1.38511	0.440057	4.35974	0.562
SLC7A1	1.41043	0.447095	4.44945	0.563
MYLK	1.4195	0.450252	4.47523	0.564
STK31	0.719578	0.228543	2.26562	0.564
PABPC1L	0.727437	0.23127	2.28808	0.565
SPOCD1	0.716478	0.231079	2.22149	0.565
CST1	0.716462	0.231074	2.22144	0.566
LYST	1.41642	0.449181	4.46647	0.566
EDNRB	0.716799	0.231183	2.22249	0.566
CEP250	0.728484	0.22107	2.40055	0.566
MYO5A	0.720858	0.228988	2.26928	0.566
DPEP2	1.37638	0.437538	4.32976	0.566
IGLC2	0.716656	0.231137	2.22205	0.566
DACT3	1.39459	0.449783	4.32402	0.567
CCDC68	0.723085	0.228751	2.28568	0.568
HMGB3	0.724421	0.230224	2.27945	0.569
PODNL1	1.38964	0.448184	4.3087	0.57
AKAP5	0.724265	0.229085	2.2898	0.571
NEURL1B	0.719917	0.232187	2.23217	0.571
PCDHGB7	1.38967	0.448195	4.3088	0.571
ONECUT2	1.38708	0.447358	4.3008	0.571
MT1H	0.713286	0.225969	2.25154	0.572
FAM129A	1.40824	0.446328	4.4432	0.572
ARHGAP30	0.715552	0.226613	2.25942	0.572
MYOCD	0.725885	0.230732	2.28364	0.573
FAM212B	1.38469	0.446585	4.2934	0.573
TLCD2	0.720646	0.232421	2.23444	0.573
CA2	1.36623	0.414972	4.49811	0.574
ADGRG1	1.38492	0.446658	4.2941	0.574
CACNB2	1.38678	0.447262	4.29988	0.574
CHI3L1	0.721352	0.232648	2.23663	0.574
GINM1	1.37813	0.44446	4.27313	0.575
MXD1	1.38479	0.446617	4.29371	0.575
RIMS3	0.716004	0.226742	2.26099	0.575
COLEC12	1.38143	0.445529	4.28332	0.575
SLC25A23	1.3834	0.446168	4.28942	0.576
SLC13A2	0.722515	0.22859	2.28369	0.576
SMCHD1	1.37471	0.443353	4.26259	0.576
TESPA1	0.718454	0.227438	2.26952	0.577
KIF5C	0.729364	0.231938	2.29359	0.578
PDCD4-AS1	0.724265	0.233585	2.2457	0.578
CDCA4	0.713888	0.22614	2.25363	0.578
CWH43	0.72795	0.234767	2.25717	0.579
RGS16	1.3804	0.445196	4.28014	0.579
NOX4	1.39408	0.441389	4.40303	0.579
HRCT1	1.35695	0.412674	4.46189	0.58
DNASE1L3	0.707816	0.210489	2.38018	0.581
MIR22HG	1.36669	0.434731	4.29653	0.581
AQP7	1.392	0.440664	4.39714	0.581
PDE2A	1.3758	0.443707	4.26596	0.582
ARHGAP10	1.37418	0.443181	4.26095	0.582
ABLIM3	0.726775	0.234391	2.25351	0.582
PRKAA2	1.37412	0.443162	4.26077	0.583
SLC8A1	0.72997	0.232148	2.29533	0.583
ATG9B	1.38805	0.439285	4.38596	0.583
GAS7	0.730295	0.232261	2.29626	0.583
LRP11	0.732684	0.222584	2.41179	0.584
DISP2	1.36117	0.43313	4.27765	0.585
CACNA2D1	1.39221	0.440739	4.39775	0.586
CMSS1	0.73517	0.233949	2.31023	0.586
NME1	1.36099	0.433078	4.27703	0.586
EPHA4	1.36395	0.43986	4.22942	0.587
KRT6B	0.721349	0.228259	2.27962	0.587
RAB27A	1.34564	0.428611	4.22468	0.588
WDR77	0.730628	0.235626	2.26553	0.588
PGM1	0.712205	0.211508	2.39819	0.588
BCL2L1	1.37308	0.434049	4.34361	0.588
PTPRR	1.36859	0.441367	4.24371	0.588
NEBL	0.736191	0.234302	2.31316	0.589
C1orf109	0.731059	0.235764	2.26687	0.589
SLC22A23	1.34856	0.429462	4.23462	0.589
MEP1A	0.730483	0.23558	2.26507	0.589
IGLV5-45	0.731589	0.235934	2.26853	0.591
ID2	0.729851	0.230663	2.30935	0.591
GJB4	1.358	0.432209	4.26682	0.591
TSSK6	0.739298	0.235376	2.32208	0.591
SYNPO2	1.38248	0.437336	4.37018	0.592
SMPD1	1.34446	0.428267	4.22066	0.592
F2RL1	1.36512	0.44024	4.23303	0.592
KLK6	1.36472	0.440112	4.23181	0.592
SOX9	1.37369	0.434263	4.34534	0.593
THRB	0.73767	0.234813	2.3174	0.593
AC138207.8	0.733685	0.236605	2.27507	0.593
CD247	0.725277	0.229372	2.29334	0.593
NMB	0.723407	0.228843	2.28681	0.593
TMEM220	1.36306	0.439571	4.22668	0.594
IGLV1-47	0.733692	0.236607	2.27509	0.594
RPS6KL1	0.746249	0.237777	2.34206	0.594
CCNO	1.34668	0.428915	4.22823	0.594
MARC2	1.35395	0.431032	4.253	0.594
C20orf24	1.357	0.431918	4.2634	0.594
FAM13B	0.737112	0.237701	2.28579	0.596
RECK	1.38084	0.436765	4.36556	0.596
ZNF121	0.742334	0.236425	2.3308	0.596
ADTRP	0.732699	0.231466	2.31934	0.597
PEG10	1.35872	0.438161	4.21334	0.597
TBRG4	1.35149	0.430316	4.24462	0.597
DUSP2	0.742158	0.236365	2.33029	0.597
HSP90AB1	0.739865	0.235572	2.3237	0.598
KIAA1257	0.742565	0.236505	2.33146	0.598
EPHB4	1.3562	0.437339	4.20558	0.598
VPS13D	1.37092	0.433294	4.33752	0.599
METTL26	1.34899	0.429589	4.23611	0.599
CD79A	0.737883	0.237947	2.2882	0.6
NRIP1	0.742652	0.236535	2.33171	0.6
VARS	0.729218	0.230485	2.30713	0.6
FGD4	1.35619	0.437338	4.20556	0.6
RNF32	0.742905	0.236623	2.33244	0.6
NCAM1	1.34887	0.434953	4.18307	0.601
TMEM82	0.733879	0.231798	2.32348	0.601
MEST	0.741945	0.236291	2.32968	0.601
FAM161B	0.74092	0.238917	2.29771	0.601
AC004967.1	0.753433	0.240254	2.36275	0.601
CTU2	0.729594	0.230591	2.30845	0.601
NR2C2AP	1.34919	0.435057	4.18405	0.602
FENDRR	0.733764	0.231766	2.32308	0.603
JAML	1.33196	0.406446	4.36493	0.603
UBE2S	1.34361	0.409357	4.41003	0.603
PDE4D	1.34447	0.43352	4.16959	0.604
LTK	0.739285	0.238395	2.29259	0.604
FRMD4B	1.34521	0.433761	4.17186	0.604
NOP2	0.74756	0.23823	2.34583	0.606
CPXM2	1.36538	0.431355	4.32189	0.606
IGHV2-26	0.741235	0.239018	2.2987	0.606
SFRP1	1.34871	0.434901	4.18258	0.607
IL11RA	0.748238	0.238463	2.34778	0.609
EVA1A	1.36389	0.402411	4.62262	0.609
FAM53A	1.34201	0.423158	4.25606	0.609
MT1X	1.33156	0.424497	4.17685	0.61
CAPN9	1.33415	0.425253	4.18562	0.61
C15orf48	1.33637	0.425904	4.19316	0.61
RSAD2	0.744097	0.23993	2.30767	0.611
MT1M	0.739421	0.233355	2.34297	0.612
P2RX1	1.33216	0.424673	4.17889	0.612
ZNF132	0.749594	0.238931	2.35169	0.613
PAMR1	0.73985	0.233475	2.34448	0.613
POU2F2	0.749994	0.239069	2.35284	0.613
SPNS3	0.736489	0.232532	2.33266	0.613
PODXL2	1.33859	0.4316	4.15156	0.613
HGH1	1.33408	0.430129	4.13778	0.615
AL117382.1	0.75216	0.239816	2.35908	0.615
MADCAM1	0.741191	0.233851	2.34921	0.616
TSPAN11	0.747991	0.241171	2.3199	0.617
CRNDE	0.752434	0.23991	2.35987	0.619
PID1	0.749751	0.241731	2.32543	0.619
MOB3B	0.753078	0.237169	2.39123	0.62
FOXN3	0.75427	0.230356	2.46976	0.62
FAM86JP	0.752773	0.240027	2.36085	0.62
IL6R	1.33187	0.429405	4.13101	0.621
SUCLG2	0.752704	0.242669	2.33472	0.621
ICAM3	0.742676	0.234266	2.35444	0.621
RNF125	1.33174	0.429362	4.1306	0.622
MT1E	0.743309	0.234444	2.35668	0.622
WNT2	0.755186	0.240858	2.36781	0.623
LINC00294	1.32982	0.428736	4.12475	0.623
AC105942.1	1.3187	0.420723	4.13331	0.623
TCN1	1.31147	0.401292	4.28601	0.623
DBNDD1	1.32509	0.427188	4.1103	0.624
NEU4	0.751759	0.242369	2.33174	0.624
CD37	0.748831	0.235986	2.37619	0.624
JPH2	1.32779	0.428072	4.11855	0.625
DIXDC1	0.758502	0.231878	2.48116	0.625
GIMAP8	0.757613	0.244227	2.35018	0.625
FABP6	0.757285	0.241581	2.37387	0.625
CHCHD6	0.753402	0.242891	2.33691	0.625
IGLV4-69	1.31741	0.420342	4.12893	0.626
AMPD2	1.32151	0.426016	4.09937	0.626
TGFB1I1	1.32771	0.428044	4.11829	0.626
PCAT6	0.757498	0.24419	2.34982	0.626
LRRC61	1.32275	0.42642	4.10314	0.627
TRIM29	1.32058	0.425711	4.09653	0.627
PHLPP2	0.757922	0.2418	2.37571	0.628
MRGPRF	1.32051	0.425688	4.09632	0.628
ABI3BP	1.31822	0.424936	4.08933	0.629
DUS4L	1.33306	0.420013	4.23091	0.629
CIDEC	0.749758	0.236245	2.37947	0.63
TMEM133	0.762247	0.233224	2.49125	0.63
PLA2G10	0.748664	0.23594	2.3756	0.63
KLK1	1.30867	0.417768	4.09942	0.63
RAP1A	0.761086	0.245327	2.36114	0.631
BANK1	0.760658	0.242741	2.38361	0.631
DSEL	1.3212	0.425912	4.0984	0.632
HHEX	1.32085	0.425798	4.09735	0.632
IGKV1-9	0.757537	0.244202	2.34994	0.633
SCP2	0.760123	0.245022	2.3581	0.634
STK17B	1.2982	0.414678	4.06419	0.634
PRR36	1.31806	0.424884	4.08884	0.635
TNXB	1.32827	0.41833	4.21748	0.636
TMEM72	0.753707	0.237344	2.39346	0.636
TNFSF15	0.762429	0.24335	2.38873	0.636
WNT9A	1.33015	0.418993	4.22277	0.636
ZNF677	1.33318	0.420058	4.23127	0.636
FAM107B	1.31116	0.422619	4.06781	0.636
VWA2	0.764972	0.244224	2.39609	0.636
MTUS1	0.762106	0.245649	2.36437	0.636
FXYD6	1.32836	0.418364	4.21775	0.637
TEF	1.31558	0.424072	4.08129	0.637
GIMAP7	0.76358	0.246116	2.36902	0.637
MYO1A	0.756783	0.238199	2.40438	0.637
LY96	1.30919	0.421973	4.06182	0.637
SLC35G1	0.760707	0.245207	2.35995	0.638
RUSC1-AS1	0.766047	0.244593	2.3992	0.638
LOXL2	0.761548	0.245473	2.3626	0.638
MTM1	0.764742	0.246483	2.3727	0.639
TNFRSF12A	1.30502	0.420605	4.04915	0.639
ADAMTS6	0.764314	0.243998	2.39419	0.639
CCNL2	0.764788	0.246498	2.37284	0.639
ARHGAP39	0.773875	0.247279	2.42189	0.641
TNFRSF13C	0.763258	0.246014	2.36801	0.642
GUCY1A3	0.76624	0.244659	2.39976	0.642
MAFG-AS1	1.30749	0.421416	4.05665	0.643
MRGBP	0.776902	0.238487	2.53086	0.643
ZFAS1	0.768754	0.245522	2.40704	0.644
GLA	1.3032	0.416154	4.08099	0.644
NAT1	1.29002	0.412256	4.03671	0.645
LINC00346	1.30761	0.421454	4.05701	0.645
DCN	0.76951	0.245782	2.40923	0.645
PLN	1.31819	0.414783	4.18923	0.648
PPARGC1A	1.30434	0.420381	4.04708	0.648
CEP72	0.771877	0.246594	2.41609	0.649
KLRB1	1.28444	0.394429	4.18273	0.649
BARX2	1.28777	0.395277	4.19539	0.65
PLXNA1	1.29675	0.417884	4.02402	0.651
CBX2	1.28798	0.404133	4.10484	0.652
CFD	1.29728	0.397699	4.23169	0.653
DDX55	0.77995	0.24936	2.43954	0.653
DPYD	0.773002	0.24909	2.39886	0.653
VCL	0.772842	0.246925	2.41889	0.653
DUSP14	0.774913	0.247635	2.4249	0.653
SH2D2A	1.30049	0.408547	4.13974	0.654
FCN1	1.29793	0.418271	4.02759	0.654
CYS1	1.29991	0.408343	4.13812	0.655
COL28A1	1.29728	0.418058	4.02562	0.655
KLHL6	0.773104	0.249122	2.39919	0.655
TBX10	0.770857	0.248414	2.39206	0.655
SGCD	1.30879	0.411472	4.16292	0.655
HSD17B2	1.28156	0.393692	4.17177	0.656
IL23A	1.29548	0.417463	4.02014	0.656
AHNAK2	1.30843	0.411347	4.16193	0.656
JAM2	1.29502	0.417312	4.01875	0.657
HSPB6	1.29558	0.417497	4.02045	0.657
NUFIP1	0.776246	0.238252	2.52908	0.657
HIF3A	1.29369	0.416875	4.01471	0.658
AKR1C1	0.780511	0.249552	2.44117	0.658
IFITM1	1.29198	0.416312	4.00953	0.658
AC104083.1	1.30427	0.40988	4.15029	0.659
HAGHL	1.28722	0.411425	4.02732	0.659
WDR7	1.2834	0.413482	3.98353	0.661
COL14A1	0.777436	0.248499	2.43223	0.661
CARMIL3	0.779789	0.249305	2.43907	0.662
KBTBD11	1.28195	0.40986	4.00967	0.662
TRPA1	0.7727	0.242596	2.46115	0.663
IL1R2	0.780227	0.251363	2.42182	0.665
PPM1H	0.785258	0.241485	2.5535	0.665
CD7	1.27747	0.408526	3.99465	0.665
AC131097.3	0.777148	0.250395	2.41203	0.665
SNHG15	0.784294	0.250845	2.45217	0.666
LMOD1	1.2836	0.413547	3.98413	0.667
CD27	1.27595	0.408074	3.98957	0.667
RHPN1	1.27888	0.411988	3.96984	0.667
SORBS2	0.782694	0.240565	2.54654	0.668
AL139089.1	0.78509	0.251118	2.45449	0.669
GAS5	1.28318	0.41341	3.98287	0.669
GPT2	1.27673	0.408306	3.99218	0.67
APMAP	0.783842	0.250691	2.45086	0.67
NR3C1	1.27199	0.409712	3.94904	0.672
TESMIN	1.2794	0.41216	3.97142	0.672
TCP11L1	1.27815	0.411749	3.96765	0.673
ME2	0.785854	0.251379	2.45672	0.673
SMIM10	0.785918	0.241721	2.55529	0.673
SPOCK2	1.26484	0.40476	3.95249	0.673
LINC02441	0.783303	0.252328	2.43161	0.674
EXOSC2	1.27135	0.406703	3.97421	0.674
PCK1	1.27651	0.411204	3.96268	0.674
C16orf59	1.2726	0.407076	3.97839	0.674
GLOD5	0.783945	0.252529	2.43365	0.675
GABRA2	1.26936	0.40611	3.96756	0.675
CASP5	0.778278	0.244128	2.48115	0.676
SQLE	0.788985	0.252448	2.46584	0.677
ANKS6	0.788116	0.252152	2.46331	0.678
MARCKS	0.78864	0.252331	2.46484	0.678
TFCP2L1	1.28372	0.402627	4.09296	0.678
SHMT2	0.786148	0.25322	2.44068	0.679
DTX2P1	0.790432	0.252942	2.47006	0.679
AL161431.1	0.788895	0.252418	2.46558	0.679
TSPAN1	1.26153	0.388551	4.0959	0.68
MOCS3	0.796629	0.255056	2.48815	0.68
LINC01979	0.792969	0.253808	2.47746	0.681
LRRC31	0.796154	0.256349	2.47265	0.681
MTHFD1L	1.26636	0.407849	3.93205	0.683
VWA5A	0.790746	0.25466	2.45535	0.683
CPSF1	1.26493	0.407374	3.92773	0.683
SCN9A	0.791676	0.253367	2.47369	0.685
ATP11A	1.27486	0.399496	4.06831	0.685
FZD4	1.2659	0.407696	3.93066	0.685
FAM149A	0.782935	0.245402	2.49789	0.685
TUSC3	1.25348	0.401361	3.91468	0.687
TGDS	0.794932	0.254478	2.48319	0.687
B3GNT8	1.25993	0.403293	3.93613	0.687
PTGER4	0.792657	0.248052	2.53295	0.688
TLR1	1.24648	0.399262	3.89144	0.688
MPZ	1.26285	0.406685	3.92146	0.689
TRHDE	1.26124	0.406149	3.91658	0.689
GPR157	0.795282	0.254597	2.48422	0.689
TRAK2	1.26159	0.406266	3.91764	0.69
SERPINH1	0.792555	0.255225	2.46113	0.69
FAAH2	1.25592	0.402095	3.92281	0.69
RCAN1	1.25468	0.403975	3.89684	0.691
ZBTB7B	1.25425	0.401594	3.91725	0.691
PNLIPRP2	0.793423	0.255496	2.46391	0.691
PERP	0.80307	0.247864	2.60191	0.691
AC245369.3	0.794266	0.25576	2.4666	0.691
FXYD3	0.788319	0.246872	2.51729	0.691
IRF4	0.794244	0.255753	2.46653	0.692
ITPKB	1.25918	0.405466	3.91037	0.692
SEMA6A	0.79527	0.256074	2.46982	0.693
EBF1	1.25171	0.402988	3.88791	0.693
GATD1	0.794748	0.25591	2.46815	0.693
GPC6	0.797118	0.255223	2.48958	0.693
SEC14L2	0.804209	0.257637	2.51032	0.693
GDPD5	0.803513	0.248023	2.60312	0.693
CAPN2	1.24762	0.399605	3.89523	0.694
CES3	0.793213	0.248203	2.53497	0.694
MAP4K1	0.795194	0.25605	2.46957	0.694
NRG1	0.795717	0.256213	2.47125	0.694
MIPOL1	1.26449	0.395828	4.0395	0.694
FGFR4	0.796066	0.256322	2.47236	0.694
TSPAN2	0.79836	0.255646	2.49321	0.695
PCED1B-AS1	1.24637	0.39923	3.89109	0.695
RALGAPA1P1	0.799234	0.246492	2.59147	0.695
CHL1	0.80015	0.256256	2.49845	0.697
VSNL1	1.2532	0.403483	3.89239	0.697
LINC02418	0.814017	0.251779	2.63177	0.697
ATP6V1C2	0.80142	0.256688	2.50216	0.697
PIK3CG	0.802136	0.258214	2.49182	0.698
PMEPA1	0.802962	0.257213	2.50667	0.698
RHEBL1	0.798087	0.256952	2.47884	0.698
TG	0.803583	0.257424	2.50849	0.698
SLMAP	0.802	0.247481	2.599	0.699
SOX4	0.800944	0.256526	2.50077	0.699
IGHV1-46	0.79857	0.257103	2.48038	0.699
STMN2	1.25209	0.403116	3.88906	0.7
RAB27B	1.24303	0.398226	3.88001	0.7
KIT	0.802107	0.256922	2.50417	0.7
HPGD	0.802777	0.258414	2.49388	0.701
PPARGC1B	0.800182	0.257605	2.48555	0.701
JAZF1	1.2493	0.402186	3.88064	0.701
ADH1C	0.799691	0.257452	2.48398	0.701
MPC1	1.23801	0.382458	4.00741	0.701
SLC22A3	1.25126	0.391139	4.00279	0.701
WDR62	0.799689	0.257452	2.48397	0.701
CCDC69	1.24438	0.398631	3.88448	0.702
P2RY14	0.803183	0.25854	2.49518	0.703
TSNARE1	0.810519	0.250528	2.62222	0.703
LIPG	0.800812	0.257802	2.48757	0.703
SLC9A9	1.23871	0.396928	3.86572	0.704
RAB37	0.804319	0.257674	2.51065	0.704
RGMA	1.24338	0.400219	3.86287	0.705
CAMK2N1	1.2413	0.397706	3.87428	0.705
UGT1A10	0.803016	0.258488	2.49464	0.706
PC	0.796857	0.249192	2.54816	0.707
APBB1IP	0.807413	0.259855	2.50877	0.707
SNRPB	1.23374	0.381347	3.99143	0.708
PRDX4	0.799657	0.249951	2.55831	0.708
LTB	1.23819	0.396772	3.864	0.708
RDH5	0.805091	0.259134	2.5013	0.709
IGHV3-21	0.804369	0.258909	2.49899	0.709
TRPM2-AS	0.805372	0.259221	2.50221	0.709
SYT7	0.811163	0.250759	2.62398	0.709
FABP1	0.804531	0.258959	2.49951	0.709
CCDC88A	1.24181	0.399696	3.85815	0.709
LMO2	1.23196	0.394894	3.8434	0.71
SORD	0.80751	0.259885	2.50908	0.71
HHIP	0.808648	0.259146	2.52333	0.711
SNHG12	0.806249	0.259494	2.50503	0.711
CBX7	1.23949	0.398925	3.85121	0.712
APPL2	0.806657	0.25962	2.50634	0.712
PTGIS	1.24902	0.390346	3.99659	0.712
ST6GALNAC3	0.81238	0.253382	2.60461	0.713
SCUBE1	1.22675	0.379521	3.9653	0.713
PANK3	0.810962	0.259932	2.53012	0.715
DDIT4	0.813593	0.260825	2.53785	0.715
PTP4A3	0.813796	0.260894	2.53844	0.715
INAFM2	1.24474	0.388829	3.98474	0.716
CLCA1	0.805382	0.251498	2.57911	0.716
ZFYVE28	1.23501	0.397432	3.83776	0.717
ASGR1	0.810321	0.260758	2.51812	0.717
TKT	0.804251	0.251193	2.57499	0.718
EPHX2	1.22816	0.393746	3.83083	0.718
AC008735.2	1.23073	0.396004	3.82493	0.718
MIR3142HG	0.813964	0.261888	2.52985	0.718
DNAH14	0.812493	0.251234	2.62761	0.718
TUBA1A	0.814187	0.261026	2.53959	0.718
B3GNTL1	1.23007	0.394323	3.83714	0.719
ICA1	1.23285	0.396712	3.83129	0.72
PREX2	0.814064	0.251795	2.6319	0.721
IGHV3-30	0.812669	0.261486	2.52568	0.722
CCND1	0.818845	0.253503	2.64496	0.722
OLFML1	0.815161	0.261357	2.54245	0.722
ABCB6	1.22567	0.394316	3.80979	0.722
TRPC1	1.23908	0.386821	3.96908	0.722
FAT4	0.815258	0.26139	2.54274	0.722
GPT	1.21867	0.377404	3.93516	0.723
[truncated: 747 more rows]
